# Supplementary material for: Euthanasia and physician-assisted suicide not meeting due care criteria in the Netherlands: a qualitative review of review committee judgements
Source: PubMed Central journal article supplement — BMJ Open. 2017 Oct 25;7(10):e017628. doi: 10.1136/bmjopen-2017-017628 (PMC5665211; doi:10.1136/bmjopen-2017-017628), 2017-10-25
Supplement: bmjopen-2017-017628.draft_revisions.pdf [file bmjopen-2017-017628.draft_revisions.pdf]

# BMJ Open

BMJ Open is committed to open peer review. As part of this commitment we make the peer review history of every article we publish publicly available.

When an article is published we post the peer reviewers' comments and the authors' responses online. We also post the versions of the paper that were used during peer review. These are the versions that the peer review comments apply to.

The versions of the paper that follow are the versions that were submitted during the peer review process. They are not the versions of record or the final published versions. They should not be cited or distributed as the published version of this manuscript.

BMJ Open is an open access journal and the full, final, typeset and author-corrected version of record of the manuscript is available on our site with no access controls, subscription charges or pay-per-view fees (<http://bmjopen.bmj.com>).

If you have any questions on BMJ Open's open peer review process please email [editorial.bmjopen@bmj.com](mailto:editorial.bmjopen@bmj.com)

# BMJ Open

## Euthanasia and Assisted Suicide Not Meeting Due Care Criteria in the Netherlands: A Qualitative Review of Review Committee Judgments

|                                    |                                                                                                                                               |
|------------------------------------|-----------------------------------------------------------------------------------------------------------------------------------------------|
| Journal:                           | <i>BMJ Open</i>                                                                                                                               |
| Manuscript ID                      | bmjopen-2017-017628                                                                                                                           |
| Article Type:                      | Research                                                                                                                                      |
| Date Submitted by the Author:      | 04-May-2017                                                                                                                                   |
| Complete List of Authors:          | Miller, D. Gibbes; National Institutes of Health, Department of Bioethics<br>Kim, Scott; National Institutes of Health, Bioethics             |
| <b>Primary Subject<br>Heading</b>: | Health policy                                                                                                                                 |
| Secondary Subject Heading:         | Ethics, Palliative care                                                                                                                       |
| Keywords:                          | euthanasia, assisted suicide, netherlands, MEDICAL ETHICS, Health policy<br>< HEALTH SERVICES ADMINISTRATION & MANAGEMENT, PALLIATIVE<br>CARE |
|                                    |                                                                                                                                               |

SCHOLARONE™  
Manuscripts

Word Count: 4,125  
Number of Tables and Figures: 5

**Euthanasia and Assisted Suicide Not Meeting Due Care Criteria in the Netherlands:  
A Qualitative Review of Review Committee Judgments**

D Gibbes Miller, MSc, Scott Y H Kim, MD, PhD

Department of Bioethics, National Institutes of Health, 10 Center Drive, MSC 1156, Clinical Center (Building 10), Room 1C118, Bethesda, MD 20892

D Gibbes Miller  
Fellow

Scott Y H Kim  
Senior Investigator

*Correspondence to:* Scott Y H Kim, [scott.kim@nih.gov](mailto:scott.kim@nih.gov)

*Acknowledgements*

We are grateful to Frank Miller, Raymond De Vries, Trudo Lemmens, and Sophia Gibert for comments on earlier drafts.

*Disclaimer*

The opinions expressed herein are those of the authors and do not reflect the policies and positions of the National Institutes of Health, the U.S. Public Health Service, or the U.S. Department of Health and Human Services.

*Copyright*

The authors are US government employees and cannot grant copyright. The National Institutes of Health publishing agreement included in this submission allows the BMJ Publishing Group Ltd to permit this article (if accepted) to be published in BMJ editions and any other BMJ PGL products and sublicences such use and exploit all subsidiary rights, as set out in its licence.

*Details of Contributors*

Both authors had full access to all of the data in this study and affirm that the manuscript is an honest, accurate, and transparent account of the study being reported; that no important aspects of the study have been omitted; and that any discrepancies from the study as planned have been explained.

*Ethics Approval*

Ethical approval was not required for this study.

1  
2  
3 *Disclosures*

4 This document review did not involve direct patient interaction.  
5  
6

7 *Data Sharing*

8 (Not applicable) All data analyzed are currently publicly available.  
9

10 *Protocol*

11 (Not applicable) All study procedures are described in the paper.  
12  
13

14 *Keywords*

15 Euthanasia, Assisted Suicide, Netherlands, Review Committees  
16  
17  
18  
19  
20  
21  
22  
23  
24  
25  
26  
27  
28  
29  
30  
31  
32  
33  
34  
35  
36  
37  
38  
39  
40  
41  
42  
43  
44  
45  
46  
47  
48  
49  
50  
51  
52  
53  
54  
55  
56  
57  
58  
59  
60

1  
2  
3 **Objectives:** To assess how Dutch Regional Euthanasia Review Committees (RTE) apply the  
4 euthanasia and assisted suicide (EAS) due care criteria in cases where the criteria are judged not  
5 to have been met ('due care not met,' DCNM), and to evaluate how the criteria function to set  
6 limits in Dutch EAS practice.  
7  
8

9  
10 **Design:** A qualitative review using directed content analysis of DCNM cases in the Netherlands  
11 from 2012 to 2016 published on the RTE website (<https://www.euthanasiecommissie.nl/>) as of  
12 January 31, 2017.  
13

14 **Results:** Of 33 due care not met cases identified (occurring from 2012 to 2016), 32 cases (97%)  
15 were published online and included in the analysis. 22 of these (69%) violated only procedural  
16 due care criteria, relating to improper medication administration or inadequate physician  
17 consultation. 10 cases (31%) failed to meet substantive due care criteria, with the most common  
18 violation involving the No Reasonable Alternative [to EAS] criterion (7 cases). Even in  
19 substantive criteria cases, the RTE's focus was procedural. The cases were more about the  
20 unorthodox, unprofessional, or overconfident physician behaviors and not whether patients  
21 should have received EAS. However, in some cases, physicians knowingly pushed the limits of  
22 the EAS law. Physicians from euthanasia advocacy organizations were overrepresented in the  
23 substantive criteria cases. Trained EAS consultants tended to agree with or facilitate EAS in  
24 DCNM cases. Physicians and families had difficulty in applying ambiguous advance directives  
25 of incapacitated patients.  
26  
27  
28  
29  
30

31 **Conclusion:** As a retrospective review of physician self-reported data, the Dutch Regional  
32 Euthanasia Review Committees do not focus on whether a patient should have received EAS, but  
33 instead primarily gauge whether doctors conducted EAS in a thorough and professional manner.  
34 To what extent this constitutes enforcement of strict safeguards is not clear.  
35  
36  
37  
38  
39  
40  
41  
42  
43  
44  
45  
46  
47  
48  
49  
50  
51  
52  
53  
54  
55  
56  
57  
58  
59  
60

### Strengths and Limitations of This Study:

- *Strength:* This is the first in-depth analysis of the euthanasia and assisted suicide “due care not met” case reports from the Dutch Euthanasia Review Committees.
- *Strength:* 97% of the due care not met cases from 2012-2016 were included in the review.
- *Strength:* Case reports were analyzed using directed content analysis by two separate reviewers.
- *Limitation:* Case translation may have limited some of the nuances we were able to gather from the case reports.
- *Limitation:* This study did not compare “due care not met” to “due care met” case reports, and thus cannot draw comparisons between these two types of cases.

#### What This Paper Adds

##### What is already known on this subject:

The retrospective review system for euthanasia and assisted suicide (EAS) in the Netherlands has found less than 0.2% of EAS cases not to meet the statutory EAS due care criteria since 2002. Several studies on EAS in the Netherlands have investigated how Dutch doctors interpret the due care criteria, finding that they have difficulty interpreting some of the criteria. However, there has been no systematic study analyzing how the Dutch EAS retrospective review committees interpret the due care criteria in their case reports when making “due care not met” decisions.

##### What this study adds:

The reviews of due care not met (DCNM) cases focus on procedural inadequacies of physicians who act in unusual, unprofessional, or overconfident ways, rather than directly evaluating the eligibility characteristics of patients. Some doctors knowingly push the boundaries of EAS law. Experienced consultants tend to facilitate these DCNM cases, and physicians from euthanasia advocacy organizations are disproportionately represented.

## Introduction

Euthanasia or physician-assisted suicide (EAS) is legally permitted in the Netherlands under the Termination of Life on Request and Assisted Suicide (Review Procedures) Act of 2002. Under this legislation, EAS performed by physicians is not punishable if it meets statutory due care criteria (See Boxes 1 and 2). Further, physicians are required to report all cases of EAS for review by regional euthanasia review committees (RTE committees), which retrospectively assess whether physicians complied with the criteria.

The Dutch EAS system is often cited in debates over EAS legalization in other jurisdictions. For example, in the 2015 case *Carter v. Canada (Attorney General)* overturning a federal prohibition on EAS, the Supreme Court cited existing EAS systems, including the system in the Netherlands, as evidence that risks can be minimized with legal safeguards. The Court affirmed the trial judge's opinion that "...the risks of physician-assisted death 'can be identified and very substantially minimized through a carefully-designed system' that imposes strict limits that are scrupulously monitored and enforced." [1] Evidence for these conclusions consists of quantitative surveys and death certificate reviews, supplemented by subgroup interviews. [2,3] For example, a study of EAS patients in the Netherlands from 1990-2005 did not in general find disproportionate representation of vulnerable persons. [4] These studies, however, do not provide insight into *how* the RTEs provide oversight using the due care criteria.

Some Dutch commentators state that the RTEs use the due care criteria to provide "strict limits" on EAS, pointing to "...the scrutiny of the committees and their rather rigid evaluations... So it seems, the regulations and procedures work well." [5] Yet there is an extensive discussion among Dutch doctors and researchers about the difficulty of interpreting some of the due care criteria—especially the unbearable suffering criterion. [2,6,7] For example,

1  
2  
3 a study of 2100 Dutch physicians found that, among physicians who had received a request for  
4 EAS, 25% had experienced difficulty with decision-making regarding the due care criteria, and  
5  
6 in particular with the “unbearable and hopeless suffering” and “voluntary and well-considered”  
7  
8 request criteria.[8] Despite this difficulty, according to the RTE annual reports, during a period  
9  
10 (2002 to 2016) when there were 49,287 cases of EAS in the Netherlands, only 89 cases were  
11  
12 found to be Due Care Not Met (DCNM), giving a DCNM rate of fewer than 2 cases per 1000  
13  
14 (0.18%).[9–23]  
15  
16  
17  
18  
19  
20  
21  
22  
23

### 24 BOX 1

25  
26  
27  
28  
29 Because of the Dutch system’s commitment to transparency, summaries of RTE decisions for  
30 almost all DCNM cases since 2012 are available online. We analyzed these cases to address two  
31  
32 questions. First, how do the RTE committees interpret and apply the due care criteria when  
33  
34 making DCNM decisions? Second, what can this information tell us about how the retrospective  
35  
36 review system functions as a safeguard in Dutch EAS practice?  
37  
38  
39  
40  
41

### 42 **Methods**

43  
44  
45 We reviewed all EAS DCNM cases that the RTE had published online as of Jan 31, 2017,  
46  
47 which included cases from 2012 to 2016 ([https://www.euthanasiecommissie.nl/uitspraken-en-](https://www.euthanasiecommissie.nl/uitspraken-en-uitleg/o/onzorgvuldig)  
48  
49 [uitleg/o/onzorgvuldig](https://www.euthanasiecommissie.nl/uitspraken-en-uitleg/o/onzorgvuldig)). According to the RTE, there were 10 DCNM cases in 2012, 5 cases in  
50  
51 2013, 4 cases in 2014, 4 cases in 2015, and 10 cases in 2016,[19–23] and all but one of these  
52  
53 cases were published on the RTE website. Thus, this study included 97% (32 of 33) of the  
54  
55 DCNM cases from 2012 to 2016.  
56  
57  
58  
59  
60



## BOX 2

The RTE case reports of cases involving the substantive criteria (see Box 2) were quite extensive (average 4101 words) and very detailed in some cases (range 2236-8688 words). The cases involving only procedural criteria were more brief and straightforward (average 2282 words, range 1176-4166). Thus, for the procedural cases, we used online translation tools and as-needed consultations with Dutch-speaking academics to clarify passages; the 10 substantive criteria cases were translated by certified medical translators through the National Institutes of Health Library's translation services.[24]

The case reports were analyzed using a previously described method,[24,25] through directed content analysis[26] primarily focused on reasons given by the RTEs for why each of the due care criteria had not been met, but also coding for any emergent themes and patterns. A coding scheme was developed by the authors as they independently read the reports. D.M. and S.K. independently coded all of the reports, and discrepancies were resolved through discussion. Data were entered into SPSS software for descriptive analysis only.

## **Results**

### Characteristics of the Due Care Not Met Cases

The characteristics of the patients are summarized in Table 1. The most common diagnosis was cancer (18/32, 56%). 6 cases (19%) involved neurodegenerative diseases, including Alzheimer's disease, Parkinson's Disease, and Huntington's Disease. There was one

1  
2  
3 case (2014-01) of EAS for psychiatric reasons (bipolar depression). Many patients had more than  
4  
5 one medical condition, including stroke, heart failure, tinnitus, vision loss, aphasia, and chronic  
6  
7 pain, but one patient (2012-17) had no medical condition as a basis for EAS.  
8  
9

10  
11 22 of 32 cases (69%) failed to meet only procedural criteria, while 10 cases (31%) did not  
12  
13 meet at least one substantive criterion. The patient's primary doctor refused to perform EAS in 6  
14  
15 cases (5 substantive, 1 procedural), and in all 6 cases, the patients relied on EAS advocacy  
16  
17 organizations (See Box 1) to provide EAS.  
18  
19

#### 20 21 22 23 24 TABLE 1 25 26 27

#### 28 29 30 Procedural Criteria (Table 3) 31 32

33 *Consultation* (10/32 cases, 31%). The most common reason (7 of 10 cases) for not  
34  
35 meeting this criterion was lack of independence: the consultant (see Box 1) was already familiar  
36  
37 with the case, had professional or financial ties to the EAS physician, or, in one case (2012-31)  
38  
39 the consultant trained by the organization Support and Consultation on Euthanasia in the  
40  
41 Netherlands (SCEN, see Box 1) essentially took over a case from the physician. In one case  
42  
43 (2016-86) the EAS physician treated the consultation as immaterial, telling the consultant that he  
44  
45 would proceed regardless of the evaluation. In another case (2013-106) the time between  
46  
47 consultation and EAS implementation was deemed to be too long. The psychiatric EAS case  
48  
49 (2014-01) was notable because, despite an independent consultation with a SCEN doctor, the  
50  
51 RTE determined that the physician should have obtained a specialist consultation because neither  
52  
53 the EAS physician nor the consultant was a psychiatrist.  
54  
55  
56  
57  
58  
59  
60

1  
2  
3 We examined disagreements between the EAS performing physician and SCEN  
4 consultants: cases 2012-33 and 2016-37. In each case two consultants disagreed about whether  
5 the due care criteria had been met. In case 2012-32 the consultant did not find unbearable  
6 suffering, but expected the patient would eventually have it, and the physician performed EAS  
7 without a second consult. In one case (2016-86) the physician pressured the consultant to find the  
8 due care criteria met.  
9  
10  
11  
12  
13  
14  
15  
16  
17

18 In some cases the consultants were *more* active than the EAS physicians in facilitating  
19 the EAS, in several ways: taking over key aspects of the case (2012-31); directing the physician  
20 to refer the patient to an End of Life Clinic physician (See Box 1), and then acting as the  
21 consultant to that End of Life Clinic physician (2016-21); and “immediately concluding” that  
22 due care criteria were met “to the [EAS] physician’s surprise,” advising the physician not to seek  
23 further specialty consultations (2014-05). And in case 2012-17 the physician stated that “he  
24 would not have been convinced to carry out the [EAS] request if he had not received  
25 ‘permission’ from the SCEN physician.”  
26  
27  
28  
29  
30  
31  
32  
33  
34  
35  
36  
37

38 *Due Medical Care* (14/32, 44%). This criterion was most commonly not met because  
39 physicians incorrectly used drugs, dosing regimes (too low), route of administration  
40 (intramuscular instead of intravenous), or order of administration of EAS drugs (e.g. paralytic  
41 before sedative). In two cases (2012-38 and 2012-39) the physicians were repeat offenders: they  
42 had made similar errors in previous EAS cases. In one case (2016-85) the physician covertly  
43 administered a sedative, and the family restrained the resisting patient so that additional EAS  
44 agents could be given. In two cases physicians were not prepared with sufficient medications,  
45 and they either left the patient (2015-81) to retrieve more medications, or had to order more  
46 medication from the pharmacist after initial doses had already been administered (2014-04).  
47  
48  
49  
50  
51  
52  
53  
54  
55  
56  
57  
58  
59  
60

1  
2  
3  
4  
5  
6  
7  
8  
9  
10  
11  
12  
13  
14  
15  
16  
17  
18  
19  
20  
21  
22  
23  
24  
25  
26  
27  
28  
29  
30  
31  
32  
33  
34  
35  
36  
37  
38  
39  
40  
41  
42  
43  
44  
45  
46  
47  
48  
49  
50  
51  
52  
53  
54  
55  
56  
57  
58  
59  
60

TABLE 2

Substantive Criteria (Table 4)

There was one case (2013-91) that did not meet the criterion of informing the patient. In this case, the physician refused to communicate to the RTE most of the key facts of the case, and the RTE therefore deemed all substantive criteria to be not met.

*Voluntary (4/32, 13%) and Well-Considered Request (5/32, 16%).* Judgments of voluntariness and the well-considered request were aligned in all but one case (2015-01), in which the RTE deemed the patient's request to be voluntary but not well-considered because she refused a geriatric consultation and thus was deemed not to be fully informed. For the other cases, the reasons the criteria were not met included doubts about the applicability of an incapacitated patient's advance directive (2016-85), the failure of the physician to discuss EAS alone with the patient (2014-01), and concerns about the ability of the physician to interpret the behavior of an incapacitated patient (2012-08).

*Unbearable Suffering (6/32, 19%).* In applying the unbearable suffering criterion, the RTE focused on the thoroughness of the physician's evaluation. In case 2014-05 (the woman with tinnitus) the RTE specified that the patient's condition could justify EAS, but stated that the physicians' *process* of evaluation was not thorough. In 2 other cases (2012-8 and 2014-02), the RTE doubted that unbearable suffering could be assessed given the patients' communication impairments, pointing out the inappropriateness of inferring from the look in an incapacitated patient's eyes or interpretations of nonverbal and verbal behaviors. In one case (2012-33) the

1  
2  
3 consultant stated, “The unbearable nature of her suffering was also apparent from the resolve of  
4 her request for euthanasia.” In this case, the RTE did not object to using the EAS request itself as  
5 a basis for inferring unbearable suffering, but instead doubted that the physician could have been  
6 convinced because the patient was willing to delay EAS for several months. In case 2012-17, the  
7 reason for DCNM was a matter of legal definition, as the basis of the patient’s suffering was not  
8 a medical condition.  
9

10  
11  
12  
13  
14  
15  
16  
17  
18 The RTE’s discussion of the unbearable suffering criterion in other cases was instructive  
19 as well. In case 2012-32, the consultant did not find unbearable suffering, but the RTE stated it  
20 could “deduce” from the physician’s report that the patient’s suffering became unbearable by the  
21 time EAS was actually performed. In two cases (2012-33 and 2014-02), the physician used “if it  
22 were me” reasoning. For example, 2012-33 states, “For the physician, the crucial question was  
23 whether, if he were in the patient’s position, he would find the suffering unbearable and what he  
24 would want then.” This reasoning did not draw critical comments from the RTE.  
25  
26  
27  
28  
29  
30  
31  
32  
33  
34

35  
36 *No Prospect of Improvement (6/32, 19%) and No Reasonable Alternative (7/32, 22%).*

37  
38 These two criteria were the substantive criteria that were most commonly found to be not met  
39 (and occurred together in all cases but one). In one case of a Huntington’s patient (2012-08), the  
40 RTE deemed nursing home care to be a reasonable alternative because there was no clear trigger  
41 for implementing EAS stated in the advance directive. Other reasons for not meeting these  
42 futility criteria included the non-medical source of suffering (2012-17), lack of adequate  
43 reporting (2013-91), lack of a psychiatric consult for a patient (2014-01 and 2014-05), failure of  
44 the physician to critically consider a patient’s refusal for further evaluation (2015-01), and  
45 physician rejection (without explanation) of the opinions of specialists who deemed that the  
46 patient did have reasonable alternatives (2016-21).  
47  
48  
49  
50  
51  
52  
53  
54  
55  
56  
57  
58  
59  
60

TABLE 3Unusual Behaviors of Physicians

Some of the behaviors of doctors (both EAS-providing physicians and consultants) not only formed the basis for DCNM judgments, but were notably unusual, perhaps even unprofessional. In case 2012-33 the physician did not keep medical records for the last 3 months of the patient's life. The physician in case 2013-91 refused to fill out key parts of the report form, refused to be interviewed by non-physicians on the RTE, and refused to answer key questions in person, citing patient confidentiality (despite the fact that many details were included in the consultant's report). In case 2015-01, the physician saw the patient only twice and did not examine the patient before proceeding to EAS. This physician also persuaded the consultant to revise his report with a DCM judgment, and he did not initially fully report to the RTE his EAS discussions with the patient. In case 2014-05, a psychiatrist, who had seen the patient six months before death for an End of Life Clinic triage interview, complied with the SCEN consultant's request to amend the patient's medical record with psychiatric conclusions without seeing the patient again for a psychiatric evaluation. Finally, in case 2016-86, the physician, intending to perform EAS regardless of the consultation outcome, inserted an intravenous line in the patient even before the consultant arrived.

Some due medical care violations involved unusual or unprofessional behaviors, such as the physician leaving the patient during EAS to obtain backup drugs (2015-81), the physician ordering backup EAS drugs from a pharmacist after administering the first set (2014-04), and the

1  
2  
3 physician injecting the EAS drugs intramuscularly instead of intravenously, despite explicit  
4 guidance to the contrary, because the physician did not want the patient's family to see blood or  
5 an IV placement (2016-24).  
6  
7  
8  
9

### 10 Pushing the Legal Boundaries

11  
12  
13  
14 In several cases, there were indications that the physicians or consultants involved were  
15 aware they were pushing the legal boundaries in performing EAS. In case 2014-02, the  
16 consultant "realized that it was a very difficult case, and that the limits of the law would be  
17 sought here." In case 2016-85, in which the patient was surreptitiously given sedatives and later  
18 held down in order to administer more drugs, the physician justified her actions, saying that she  
19 would have performed EAS "even if the patient had said at that moment: 'I don't want to die.'"  
20 The physician "highlighted the need for transparency in this case" with the reasoning that "EAS  
21 might occur more frequently in incompetent patients."  
22  
23  
24  
25  
26  
27  
28  
29  
30  
31  
32

33  
34 In case 2012-8, "The physician declared that it did not surprise her when she was invited  
35 for an interview with the [RTE] Committee. The consultant had mentioned the possibility to  
36 her." And in case 2012-17, the physician seemed to be aware of pushing the boundaries, as he  
37 "confirmed... there was actually no question of a disease or disorder" in the patient, while stating  
38 that he would not have performed EAS if the SCEN consultant had not granted "permission."  
39  
40  
41  
42  
43  
44  
45

### 46 Prominence of EAS Advocacy Organizations

47  
48  
49 In 6 cases (6/32, 19%), physicians from EAS advocacy organizations provided EAS. The  
50 Voluntary Life Foundation[27] provided EAS in the procedural case 2012-30. In the other 5  
51 cases, the End of Life Clinic[28] provided EAS, and all 5 cases involved substantive criteria.  
52 Thus, the End of Life Clinic provided EAS for 5 of the 10 substantive criteria cases in this study  
53  
54  
55  
56  
57  
58  
59  
60

1  
2  
3 (50%). In 2 of these cases, patients registered with the End of Life Clinic because their own  
4  
5  
6 physicians refused to provide EAS (2014-02 and 2015-01). In 2016-21 the family physician  
7  
8 referred the patient to the End of Life Clinic at the SCEN consultant's suggestion.  
9

10  
11 In 3 cases involving the End of Life Clinic (2014-01, 2014-05, and 2016-21) the RTE  
12  
13 determined that the physicians should have consulted with specialists (psychiatrists or  
14  
15 neurologists). Additionally, in case 2015-01 the RTE determined that the End of Life Clinic  
16  
17 physician too easily accepted the patient's refusal of a geriatric evaluation. The RTE explicitly  
18  
19 stated in two cases (2014-01 and 2014-02) that the End of Life Clinic physicians spent too little  
20  
21 time evaluating the patients, and in case 2014-05, the RTE mentioned that the physician spent  
22  
23 too little time researching alternatives to EAS.  
24  
25  
26  
27

### 28 Discussion

29  
30  
31 Debates over the legalization of EAS often draw on evidence from the Netherlands to  
32  
33 consider how laws can be tailored and enforced to create safeguards to abuse, neglect, or  
34  
35 errors.[1] Studies of the Dutch EAS system have found little evidence of abuse[2–4] and praise  
36  
37 the “scrutiny” of the “rather rigid evaluations.”[5] However, Dutch physicians also report  
38  
39 difficulty in applying the EAS laws, and specifically in evaluating the substantive due care  
40  
41 criteria.[2,6–8] Despite this difficulty, very few cases are deemed not to meet the due care  
42  
43 criteria (0.18% of the 49,287 cases between 2002 and 2016).[9–23] Our review of DCNM cases  
44  
45 analyzed how the RTE interprets and applies the due care criteria, with a specific interest in how  
46  
47 the criteria function as safeguards. There were several notable findings.  
48  
49  
50  
51  
52

53  
54 First, the majority of cases did not meet the due care criteria for procedural or technical  
55  
56 reasons. 69% (22/32) of DCNM cases failed to meet only the procedural due care criteria (due  
57  
58  
59  
60



1  
2  
3 medical care and consulting an independent physician). These criteria are more clearly  
4 operationalized than other criteria and do not require extensive interpretation. However, even  
5  
6 when the substantive criteria were at issue, the RTE's focus was generally not on whether the  
7  
8 physician made a 'correct' judgment, but on whether the physician followed a thorough *process*  
9  
10 (i.e., whether physicians should have consulted specialists or evaluated the patient further, but  
11  
12 not whether the patient should have received EAS). Indeed, in one case (2012-32) the RTE  
13  
14 committee stated it could "deduce" the presence of unbearable suffering at the time of death,  
15  
16 even though the consultant determined that the criterion was not met. In another (2014-05), the  
17  
18 RTE specified that the patient's condition (tinnitus and hyperacusis) could justify EAS, but  
19  
20 stated that the physicians' *process* of evaluation was not thorough.  
21  
22  
23  
24  
25  
26  
27

28 The RTE may focus on procedural aspects of EAS because the review process is  
29  
30 retrospective and based on physician self-reporting, and perhaps because the RTE committees  
31  
32 seriously consider the wording of the EAS law, which is written from the perspective of  
33  
34 physicians (i.e., whether the physician is "satisfied" [see Box 2]).[29] In other words, the criteria  
35  
36 are designed and applied to evaluate the procedures doctors follow (taking "due care"), and not  
37  
38 to directly assess the actual eligibility of the patients; they appear designed to determine "was the  
39  
40 doctor careful?" more than "was EAS appropriate in that case?" This interpretation is supported  
41  
42 by the RTE's public statement that the purpose of the EAS legislation is: "1. to create legal  
43  
44 certainty for doctors caught in conflicting obligations, 2. to provide transparency in the practice  
45  
46 of euthanasia and public scrutiny, and 3. to safeguard, monitor and promote the care with which  
47  
48 medical decisions about termination of life on request are taken and the quality of such decisions  
49  
50 by bringing matters into the open and applying uniform criteria in assessing every case in which  
51  
52 a doctor terminates life." [30]  
53  
54  
55  
56  
57  
58  
59  
60

1  
2  
3  
4  
5  
6  
7  
8  
9  
10  
11  
12  
13  
14  
15  
16  
17  
18  
19  
20  
21  
22  
23  
24  
25  
26  
27  
28  
29  
30  
31  
32  
33  
34  
35  
36  
37  
38  
39  
40  
41  
42  
43  
44  
45  
46  
47  
48  
49  
50  
51  
52  
53  
54  
55  
56  
57  
58  
59  
60

Given that the RTE tends to focus on the process of EAS (even for the substantive criteria), it is not surprising that many of the DCNM cases involved physicians behaving in seemingly unorthodox or unprofessional ways. Examples of these behaviors included inadequate record keeping, repeated failures to follow standard medical procedures, incompetent use of medications, and unusual interpretations of patient confidentiality.

Second, despite the RTEs' procedural focus (e.g., DCNM because of lack of thoroughness), in some cases it was possible to infer that actual norms were violated, especially in cases where physicians were knowingly pushing the limits of the law. In the case in which the EAS physician noted that there was no medical basis (2012-17), it seems unlikely that the consultant was unaware of the law's boundaries. The doctor who performed EAS on an incapacitated woman by surreptitiously administering a sedative and restraining her to administer additional EAS agents (case 2016-85) had intended to set a precedent for other similar EAS cases that she anticipated would become more frequent.

Physicians pushing the limits of EAS laws may reflect the fact that some doctors are also advocates of EAS. This could also explain why 1 procedural case and half (5 of 10) of substantive DCNM cases were performed by physicians affiliated with EAS advocacy organizations, despite the fact that the organizations account for a small proportion of EAS cases in the Netherlands (the End of Life Clinic was involved in less than 5%, or 1,219/25,930, of EAS cases in the Netherlands from 2012-2016).[19–23] Since the End of Life Clinic does focus on patients whose EAS requests are denied, this overrepresentation may reflect the complexity of those cases. But it may also indicate that physicians from the End of Life Clinic interpret and apply EAS laws more flexibly than the RTE.

1  
2  
3 Third, several cases involved EAS for incapacitated patients. In these cases, determining  
4 whether the criteria were met was complicated. Advance directive EAS clauses without clear  
5 triggers for EAS implementation leave ambiguity regarding what constitutes a ‘request for EAS’  
6 and unbearable suffering in a patient who cannot communicate.  
7  
8  
9  
10  
11

12  
13 Fourth, the role of the SCEN doctors in DCNM cases was unexpected. They are specially  
14 trained and knowledgeable about the due care criteria. Thus, we anticipated that DCNM cases  
15 would generally involve EAS physicians going against the SCEN consultants’ recommendations.  
16 Indeed, we did find two cases of this (2012-32, 2016-86) but in most cases, the consultants either  
17 agreed with the EAS physician or played a more active role in facilitating the EAS. This seems  
18 consistent with the finding that general practitioners may interpret the law more restrictively than  
19 experienced consultants or RTE members.[31] This dynamic may also explain why so few EAS  
20 cases are found as DCNM: if SCEN consultants and RTE committees do not interpret the EAS  
21 law as restrictively as general practitioners, then SCEN consultants will infrequently object to  
22 EAS, and the RTE committees will be unlikely to find cases to be DCNM.  
23  
24  
25  
26  
27  
28  
29  
30  
31  
32  
33  
34  
35  
36  
37

38 What are the policy implications of these findings? It seems important to recognize that  
39 the Dutch review system places tremendous trust in its physicians. For example, they are not  
40 required to follow the more experienced perspective of specially trained SCEN consultants. As  
41 one official Dutch report of EAS practice noted, “the review process is generally based on  
42 appreciation of the expertise and professionalism of the physician and the consultant.”[32]  
43 Consequently, the Dutch retrospective, procedurally-oriented, self-report system is mainly  
44 concerned with providing clear guidance to physicians and promoting transparency as the modes  
45 of providing safeguards.  
46  
47  
48  
49  
50  
51  
52  
53  
54  
55  
56  
57  
58  
59  
60

1  
2  
3 Thus, in jurisdictions considering EAS laws, debates over how best to regulate the  
4 practice should make explicit the object of an oversight system. Is the objective to directly assess  
5 whether only truly eligible patients are receiving EAS or is the objective primarily to gauge  
6 whether doctors are thorough and professional? A purely retrospective review based on  
7 physician self-reports may limit which question can realistically be answered.  
8  
9  
10  
11  
12  
13  
14

15  
16 There are important limitations of our study. First, we had to rely on case translations that  
17 combined professional medical translators with online translation services. This may have  
18 limited some of the nuanced detail we were able to gather from the cases. Additionally, we did  
19 not perform a comparative study between the DCM and the DCNM cases, so we cannot draw  
20 any firm conclusions about how the criteria are used and reviewed in due care met cases. For  
21 instance, it may be that the DCNM rates are low because doctors already rule out questionable  
22 cases by refusing.[33] This seems unlikely since one survey of Dutch general practitioners  
23 found an EAS refusal rate of only about 12% (which may include refusals for conscience  
24 reasons).[33] Since at least 12-17% of Dutch doctors oppose EAS per se, refusals for non-  
25 conscientious reasons is likely quite low.[34,35] Thus, the possibility that Dutch doctors are  
26 exceptionally good at weeding out ineligible cases among all requests is probably not the  
27 primary explanation for the low DCNM rate of less than 2 in 1000.  
28  
29  
30  
31  
32  
33  
34  
35  
36  
37  
38  
39  
40  
41  
42  
43  
44

### 45 **Conclusion**

46  
47  
48 The Dutch EAS cases judged to be DCNM generally fit three categories. First, most cases  
49 are violations of procedural criteria that do not require extensive interpretation by the RTE (the  
50 consultation and due medical care criteria). These make up the majority of the cases. Second,  
51 even violations of substantive criteria are generally about procedural inadequacies of physicians  
52 (reflected in their unusual, unprofessional, or overconfident behaviors), rather than directly about  
53  
54  
55  
56  
57  
58  
59  
60

1  
2  
3 the eligibility characteristics of patients. Third, some cases result from doctors pushing the  
4  
5 boundaries of EAS law. Other features of DCNM cases are that in general the SCEN consultants  
6  
7 either agreed with or facilitated these EAS cases and that there was a high representation of  
8  
9 physicians from euthanasia advocacy organizations.  
10  
11

12  
13 Finally, we found the transparency in the RTE system and in the self-reports of the  
14  
15 physicians and consultants notable in their frankness (i.e., physicians admitting that they knew  
16  
17 they were pushing the boundaries and describing even disturbing behaviors). This probably  
18  
19 reflects a culture of trust in the authorities that regulate the EAS system, and perhaps also the  
20  
21 awareness that no doctor under the current law has suffered any legal consequences for reporting  
22  
23 cases that do not conform to the due care criteria. Whether an EAS oversight system supported  
24  
25 by these cultural factors would translate into a system with “strict limits” in other jurisdictions  
26  
27 that use similar due care criteria is an important point for discussion.  
28  
29  
30  
31  
32  
33  
34  
35  
36  
37  
38  
39  
40  
41  
42  
43  
44  
45  
46  
47  
48  
49  
50  
51  
52  
53  
54  
55  
56  
57  
58  
59  
60

### *Contributorship*

- 1) Substantial contributions to the design of the work and the acquisition, analysis, and interpretation of data (DGM, SK)
- 2) Drafting the work or revising it critically for important intellectual content (DGM, SK)
- 3) Final approval of the version to be published (DGM, SK)
- 4) Agreement to be accountable for all aspects of the work in ensuring that questions related to the accuracy or integrity of any part of the work are appropriately investigated and resolved (DGM, SK)

### *Competing Interests*

All authors have completed the ICMJE uniform disclosure form at [www.icmje.org/coi\\_disclosure.pdf](http://www.icmje.org/coi_disclosure.pdf) and declare no support from any organisation for the submitted work, no financial relationships with any organisations that might have an interest in the submitted work in the previous three years, and no other relationships or activities that could appear to have influenced the submitted work.

### *Funding*

This research was supported in part by the Intramural Research Program of the National Institutes of Health Clinical Center.

The study sponsor played no role in the conduct of this study.

This research was conducted independently from the funders.

### *Data Sharing*

(Not applicable) All data analyzed are currently publicly available.

## Bibliography

- 1 Judgments of the Supreme Court of Canada. *Carter v. Canada (Attorney General)*. 2015 SCC5. 2015. <https://scc-csc.lexum.com/scc-csc/scc-csc/en/item/14637/index.do> (accessed 14 Mar 2017).
- 2 Rietjens JAC, van der Maas PJ, Onwuteaka-Philipsen BD, *et al*. Two Decades of Research on Euthanasia from the Netherlands. What Have We Learnt and What Questions Remain? *J Bioethical Inq* 2009;6:271–83. doi:10.1007/s11673-009-9172-3
- 3 Norwood F, Kimsma G, Battin MP. Vulnerability and the “slippery slope” at the end-of-life: a qualitative study of euthanasia, general practice and home death in The Netherlands. *Fam Pract* 2009;26:472–80. doi:10.1093/fampra/cmp065
- 4 Battin MP, Heide A van der, Ganzini L, *et al*. Legal physician-assisted dying in Oregon and the Netherlands: evidence concerning the impact on patients in “vulnerable” groups. *J Med Ethics* 2007;33:591–7. doi:10.1136/jme.2007.022335
- 5 Kimsma GK. Death by request in The Netherlands: facts, the legal context and effects on physicians, patients and families. *Med Health Care Philos* 2010;13:355–61. doi:10.1007/s11019-010-9265-0
- 6 Pasma HRW, Rurup ML, Willems DL, *et al*. Concept of unbearable suffering in context of ungranted requests for euthanasia: qualitative interviews with patients and physicians. *BMJ* 2009;339:b4362. doi:10.1136/bmj.b4362
- 7 Hanssen-de Wolf JE, Pasma HRW, Onwuteaka-Philipsen BD. How do general practitioners assess the criteria for due care for euthanasia in concrete cases? *Health Policy* 2008;87:316–25. doi:10.1016/j.healthpol.2007.12.009
- 8 Buiting HM, Gevers JKM, Rietjens JAC, *et al*. Dutch criteria of due care for physician-assisted dying in medical practice: a physician perspective. *J Med Ethics* 2008;34:e12–e12. doi:10.1136/jme.2008.024976
- 9 Regional Euthanasia Review Committees, The Hague, the Netherlands. Annual Report 2002. <https://www.euthanasiecommissie.nl/uitspraken/jaarverslagen/2002/nlendufr/nlendufr/jaarverslag-2002> (accessed 19 Sep 2016).
- 10 Regional Euthanasia Review Committees, The Hague, the Netherlands. Annual Report 2003. <https://www.euthanasiecommissie.nl/uitspraken/jaarverslagen/2003/nl-en-du/nl-en-du/jaarverslag-2003> (accessed 19 Sep 2016).
- 11 Regional Euthanasia Review Committees, The Hague, the Netherlands. Annual Report 2004. <https://www.euthanasiecommissie.nl/uitspraken/jaarverslagen/2004/nl-en-du-fr/nl-en-du-fr/jaarverslag-2004> (accessed 19 Sep 2016).



- 1  
2  
3  
4  
5  
6  
7  
8  
9  
10  
11  
12  
13  
14  
15  
16  
17  
18  
19  
20  
21  
22  
23  
24  
25  
26  
27  
28  
29  
30  
31  
32  
33  
34  
35  
36  
37  
38  
39  
40  
41  
42  
43  
44  
45  
46  
47  
48  
49  
50  
51  
52  
53  
54  
55  
56  
57  
58  
59  
60
- 12 Regional Euthanasia Review Committees, The Hague, the Netherlands. Annual Report 2005. <https://www.euthanasiecommissie.nl/uitspraken/jaarverslagen/2005/nl-en-du-fr/nl-en-du-fr/jaarverslag-2005> (accessed 19 Sep 2016).
- 13 Regional Euthanasia Review Committees, The Hague, the Netherlands. Annual Report 2006. <https://www.euthanasiecommissie.nl/uitspraken/jaarverslagen/2006/nl-en-du-fr/nl-en-du-fr/jaarverslag-2006> (accessed 19 Sep 2016).
- 14 Regional Euthanasia Review Committees, The Hague, the Netherlands. Annual Report 2007. <https://www.euthanasiecommissie.nl/uitspraken/jaarverslagen/2007/nl-en-du-fr/nl-en-du-fr/jaarverslag-2007> (accessed 19 Sep 2016).
- 15 Regional Euthanasia Review Committees, The Hague, the Netherlands. Annual Report 2008. <https://www.euthanasiecommissie.nl/uitspraken/jaarverslagen/2008/nl-en-du-fr/nl-en-du-fr/jaarverslag-2008> (accessed 19 Sep 2016).
- 16 Regional Euthanasia Review Committees, The Hague, the Netherlands. Annual Report 2009. <https://www.euthanasiecommissie.nl/uitspraken/jaarverslagen/2009/nl-en-du-fr/nl-en-du-fr/jaarverslag-2009> (accessed 19 Sep 2016).
- 17 Regional Euthanasia Review Committees, The Hague, the Netherlands. Annual Report 2010. <https://www.euthanasiecommissie.nl/de-toetsingscommissies/uitspraken/jaarverslagen/2010/nl-en-du-fr/nl-en-du-fr/jaarverslag-2010> (accessed 19 Sep 2016).
- 18 Regional Euthanasia Review Committees, The Hague, the Netherlands. Annual Report 2011. <https://www.euthanasiecommissie.nl/de-toetsingscommissies/uitspraken/jaarverslagen/2011/nl-en-du-fr/nl-en-du-fr/jaarverslag-2011> (accessed 19 Sep 2016).
- 19 Regional Euthanasia Review Committees, The Hague, the Netherlands. Annual Report 2012. <https://www.euthanasiecommissie.nl/uitspraken/jaarverslagen/2012/nl-en-du-fr/nl-en-du-fr/jaarverslag-2012> (accessed 19 Sep 2016).
- 20 Regional Euthanasia Review Committees, The Hague, the Netherlands. Annual Report 2013. <https://www.euthanasiecommissie.nl/uitspraken/jaarverslagen/2013/nl-en-du-fr/nl-en-du-fr/jaarverslag-2013> (accessed 19 Sep 2016).
- 21 Regional Euthanasia Review Committees, The Hague, the Netherlands. Annual Report 2014. <https://www.euthanasiecommissie.nl/de-toetsingscommissies/uitspraken/jaarverslagen/2014/nl/nl/jaarverslag-2014> (accessed 19 Sep 2016).
- 22 Regional Euthanasia Review Committees, The Hague, the Netherlands. Annual Report 2015. <https://www.euthanasiecommissie.nl/de-toetsingscommissies/uitspraken/jaarverslagen/2015/april/26/jaarverslag-2015> (accessed 19 Sep 2016).



- 1  
2  
3 23 Regional Euthanasia Review Committees, The Hague, the Netherlands. Annual Report 2016.  
4 <https://www.euthanasiecommissie.nl/uitspraken/jaarverslagen/2016/april/12/jaarverslag-2016>  
5 (accessed 25 Apr 2017).  
6  
7  
8 24 Kim SYH, De Vries RG, Peteet JR. Euthanasia and Assisted Suicide of Patients With  
9 Psychiatric Disorders in the Netherlands 2011 to 2014. *JAMA Psychiatry* 2016;73:362–8.  
10 doi:10.1001/jamapsychiatry.2015.2887  
11  
12 25 Doernberg SN, Peteet JR, Kim SYH. Capacity Evaluations of Psychiatric Patients Requesting  
13 Assisted Death in the Netherlands. *Psychosomatics* 2016;57:556–65.  
14 doi:10.1016/j.psych.2016.06.005  
15  
16  
17 26 Hsieh H-F, Shannon SE. Three Approaches to Qualitative Content Analysis. *Qual Health Res*  
18 2005;15:1277–88. doi:10.1177/1049732305276687  
19  
20  
21 27 SLK. Stichting Vrijwillig Leven doneert aan Levensindekliniek. Levensinde Klin.  
22 2015.[http://www.levensindekliniek.nl/blog/2015/05/13/stichting-vrijwillig-leven-doneert-](http://www.levensindekliniek.nl/blog/2015/05/13/stichting-vrijwillig-leven-doneert-aan-levensindekliniek/)  
23 [aan-levensindekliniek/](http://www.levensindekliniek.nl/blog/2015/05/13/stichting-vrijwillig-leven-doneert-aan-levensindekliniek/) (accessed 16 Mar 2017).  
24  
25  
26 28 Levensindekliniek. <https://www.levensindekliniek.nl/en/> (accessed 23 Feb 2017).  
27  
28 29 Regional Euthanasia Review Committees, The Hague, the Netherlands. Code of Practice.  
29 2015.[https://www.euthanasiecommissie.nl/de-](https://www.euthanasiecommissie.nl/de-toetsingscommissies/uitspraken/brochures/brochures/code-of-practice/1/code-of-practice)  
30 [toetsingscommissies/uitspraken/brochures/brochures/code-of-practice/1/code-of-practice](https://www.euthanasiecommissie.nl/de-toetsingscommissies/uitspraken/brochures/brochures/code-of-practice/1/code-of-practice)  
31 (accessed 19 Sep 2016).  
32  
33 30 Regionale Toetsingscommissies Euthanasie. Euthanasia: Q and A: The Termination of Life  
34 on Request and Assisted Suicide (Review Procedures) Act in practice.  
35 2016.[https://www.euthanasiecommissie.nl/uitspraken/publicaties/faq-](https://www.euthanasiecommissie.nl/uitspraken/publicaties/faq-engels/faq/faq/frequently-asked-questions)  
36 [engels/faq/faq/frequently-asked-questions](https://www.euthanasiecommissie.nl/uitspraken/publicaties/faq-engels/faq/faq/frequently-asked-questions) (accessed 28 Feb 2017).  
37  
38  
39 31 Rietjens JAC, van Tol DG, Schermer M, *et al.* Judgement of suffering in the case of a  
40 euthanasia request in The Netherlands. *J Med Ethics* 2009;35:502–7.  
41 doi:10.1136/jme.2008.028779  
42  
43 32 van der Heide A, Legemaate J, Onwuteaka-Philipsen B, *et al.* *Tweede evaluatie Wet toetsing*  
44 *levensbeëindiging op verzoek en hulp bij zelfdoding*. Den Haag: : ZonMw 2012.  
45 [https://www.rijksoverheid.nl/documenten/rapporten/2012/12/18/tweede-evaluatie-wet-](https://www.rijksoverheid.nl/documenten/rapporten/2012/12/18/tweede-evaluatie-wet-toetsing-levensbeëindiging-op-verzoek-en-hulp-bij-zelfdoding)  
46 [toetsing-levensbeëindiging-op-verzoek-en-hulp-bij-zelfdoding](https://www.rijksoverheid.nl/documenten/rapporten/2012/12/18/tweede-evaluatie-wet-toetsing-levensbeëindiging-op-verzoek-en-hulp-bij-zelfdoding)  
47  
48  
49 33 Jansen-van der Weide MC, Onwuteaka-Philipsen BD, van der Wal G. Granted, Undecided,  
50 Withdrawn, and Refused Requests for Euthanasia and Physician-Assisted Suicide. *Arch Intern*  
51 *Med* 2005;165:1698–704. doi:10.1001/archinte.165.15.1698  
52  
53  
54 34 Kouwenhoven PS, Raijmakers NJ, Delden JJ van, *et al.* Opinions of health care professionals  
55 and the public after eight years of euthanasia legislation in the Netherlands: A mixed methods  
56 approach. *Palliat Med* 2013;27:273–80. doi:10.1177/0269216312448507  
57  
58  
59  
60

- 1  
2  
3 35 Rietjens JAC, van der Heide A, Onwuteaka-Philipsen BD, *et al.* A comparison of attitudes  
4 towards end-of-life decisions: Survey among the Dutch general public and physicians. *Soc Sci*  
5 *Med* 2005;61:1723–32. doi:10.1016/j.socscimed.2005.03.024  
6  
7  
8 36 Griffiths J, Weyers H, Adams M. *Euthanasia and Law in Europe*. 2nd ed. Portland OR: : Hart  
9 Publishing 2008.  
10  
11 37 Jansen-van der Weide MC, Onwuteaka-Philipsen BD, van der Wal G. Quality of consultation  
12 and the project “Support and Consultation on Euthanasia in the Netherlands” (SCEN). *Health*  
13 *Policy* 2007;80:97–106. doi:10.1016/j.healthpol.2006.03.005  
14  
15  
16 38 Levensindekliniek. Euthanasia in the Netherlands.  
17 <https://www.levensindekliniek.nl/en/euthanasia-in-the-netherlands/> (accessed 28 Feb 2017).  
18  
19 39 Sheldon T. Mobile “life’s end” teams start work in Netherlands. *BMJ* 2012;344:e1681.  
20 doi:10.1136/bmj.e1681  
21  
22  
23 40 Snijdewind MC, Willems DL, Deliens L, *et al.* A study of the first year of the end-of-life  
24 clinic for physician-assisted dying in the Netherlands. *JAMA Intern Med* 2015;175:1633–40.  
25 doi:10.1001/jamainternmed.2015.3978  
26  
27  
28  
29  
30  
31  
32  
33  
34  
35  
36  
37  
38  
39  
40  
41  
42  
43  
44  
45  
46  
47  
48  
49  
50  
51  
52  
53  
54  
55  
56  
57  
58  
59  
60

Box 1: Brief Background on Euthanasia and Physician-Assisted Suicide Practice and Regulation in the Netherlands

The practice of legally protected euthanasia or assisted suicide (EAS) has been in existence for several decades in the Netherlands, although formal legislation was not enacted until 2002 with the Termination of Life on Request and Assisted Suicide (Review Procedures) Act.[36] Under the law, the Dutch regional euthanasia review committees (Regionale Toetsingscommissies Euthanasie [RTE]) review all EAS reports to determine whether the notifying physicians (physicians who performed EAS) acted in accordance with the statutory due care criteria laid out in section 2 of the EAS legislation (Box 2). The RTE publishes a selection of their reports to provide “transparency and auditability” of EAS practice and “to make clear what options the law gives physicians.”<sup>(p4)</sup>

Support and Consultation on Euthanasia in the Netherlands (SCEN)[37] physicians are specially trained to assist colleagues in the EAS evaluation process. They usually serve as the legally required independent physician EAS consultant but can dispense less formal advice and assistance.

In March 2012, a new organization called the End-of-Life Clinic (Levensindekliniek) began to provide EAS, primarily to patients whose own physicians had declined to perform EAS. It consists of mobile teams made up of a physician and nurse and is funded by Right to Die NL (Nederlandse Vereniging voor een Vrijwillig Levensinde [Dutch Association for a Voluntary End of Life]), a euthanasia advocacy organization.[38–40]

1  
2  
3  
4  
5  
6  
7  
8  
9  
10  
11  
12  
13  
14  
15  
16  
17  
18  
19  
20  
21  
22  
23  
24  
25  
26  
27  
28  
29  
30  
31  
32  
33  
34  
35  
36  
37  
38  
39  
40  
41  
42  
43  
44  
45  
46  
47  
48  
49  
50  
51  
52  
53  
54  
55  
56  
57  
58  
59  
60

Box 2: Dutch Euthanasia and Physician-Assisted Suicide Due Care Criteria

The RTE committees examine retrospectively whether the attending physician acted in accordance with the statutory due care criteria laid out in section 2 of [the Termination of Life on Request and Assisted Suicide (Review Procedures) Act]. As stated in the RTE Code of Practice,[29] (p. 6) these criteria require that a physician performing EAS must:

- a. be satisfied that the patient's request is voluntary and well-considered;
- b. be satisfied that the patient's suffering is unbearable, with no prospect of improvement;<sup>a</sup>
- c. have informed the patient about his situation and his prognosis;
- d. have come to the conclusion, together with the patient, that there is no reasonable alternative in the patient's situation;
- e. have consulted at least one other, independent physician, who must see the patient and give a written opinion on whether the due care criteria set out in (a) to (d) have been fulfilled;
- f. exercise due medical care and attention in terminating the patient's life or assisting in his suicide.

<sup>a</sup>Criteria a and b each have two components which the RTE committees evaluate. These requirements will be treated independently from one another and discussed separately. For example, criterion a consists of the requirement that the EAS request must be voluntary, and the separate requirement that the EAS request must be well-considered. We follow the RTE committees' convention of considering these requirements as distinct judgments.

1  
2  
3  
4  
5  
6  
7  
8  
9  
10  
11  
12  
13  
14  
15  
16  
17  
18  
19  
20  
21  
22  
23  
24  
25  
26  
27  
28  
29  
30  
31  
32  
33  
34  
35  
36  
37  
38  
39  
40  
41  
42  
43  
44  
45  
46  
47  
48  
49  
50  
51  
52  
53  
54  
55  
56  
57  
58  
59  
60

| <b>Table 1. Characteristics of Patients, Due Care Not Met Cases from 2012 to 2016, N=32.</b>                                                                                                             |            |            |
|----------------------------------------------------------------------------------------------------------------------------------------------------------------------------------------------------------|------------|------------|
| <b>Characteristic</b>                                                                                                                                                                                    | <b>No.</b> | <b>(%)</b> |
| Women                                                                                                                                                                                                    | 18         | (56)       |
| Age Group, y <sup>a</sup>                                                                                                                                                                                |            |            |
| 40-50                                                                                                                                                                                                    | 2          | (6)        |
| 50-60                                                                                                                                                                                                    | 4          | (13)       |
| 60-70                                                                                                                                                                                                    | 9          | (28)       |
| 70-80                                                                                                                                                                                                    | 5          | (16)       |
| 80-90                                                                                                                                                                                                    | 9          | (28)       |
| 90+                                                                                                                                                                                                      | 3          | (9)        |
| Substantive Criteria Case                                                                                                                                                                                | 10         | (31)       |
| EAS Advocacy Organization Case                                                                                                                                                                           | 6          | (19)       |
| Primary Doctor Refused to Provide EAS                                                                                                                                                                    | 6          | (19)       |
| Number of Doctors Involved in EAS                                                                                                                                                                        |            |            |
| 2                                                                                                                                                                                                        | 20         | (63)       |
| 3                                                                                                                                                                                                        | 10         | (31)       |
| 4                                                                                                                                                                                                        | 2          | (6)        |
| Number of Official Consultants                                                                                                                                                                           |            |            |
| 1                                                                                                                                                                                                        | 27         | (84)       |
| 2                                                                                                                                                                                                        | 5          | (16)       |
| Number of SCEN Consultants                                                                                                                                                                               |            |            |
| 0                                                                                                                                                                                                        | 2          | (6)        |
| 1                                                                                                                                                                                                        | 26         | (81)       |
| 2                                                                                                                                                                                                        | 4          | (13)       |
| Disagreement between doctors Involved                                                                                                                                                                    | 5          | (16)       |
| <sup>a</sup> These are categories used in most of the reports. Some 2012 case reports used non-overlapping age categories (e.g., 40-49 years). The 2012 cases have been converted to the current format. |            |            |

1  
2  
3  
4  
5  
6  
7  
8  
9  
10  
11  
12  
13  
14  
15  
16  
17  
18  
19  
20  
21  
22  
23  
24  
25  
26  
27  
28  
29  
30  
31  
32  
33  
34  
35  
36  
37  
38  
39  
40  
41  
42  
43  
44  
45  
46  
47  
48  
49

| Case ID  | Criteria Not Met | Patient Characteristics                                                                                                           | Judgment Summary                                                                                                                                                                                                                                                                                                                                                                                                  |
|----------|------------------|-----------------------------------------------------------------------------------------------------------------------------------|-------------------------------------------------------------------------------------------------------------------------------------------------------------------------------------------------------------------------------------------------------------------------------------------------------------------------------------------------------------------------------------------------------------------|
| 2012-30  | Consultation     | A woman, 80-89, with Parkinson's Disease, stroke, dysarthria, and incontinence                                                    | GP did not find patient to meet unbearable suffering criterion. Patient turned to Foundation for Voluntary Life (SVL); consultant, also from SVL, was already involved in the case (previously reviewed patient's file and discussed it with the physician), thus was not independent. Consultant also avoided the patient's GP.                                                                                  |
| 2012-31  | Consultation     | A woman, 80-89, with rapidly-progressing Alzheimer's Disease, pain, and vision problems                                           | GP conscientiously objected. EAS-providing physician inexperienced with EAS referred patient to an experienced SCEN consultant. Physician only evaluated the clinical status of patient, relied on consultant's EAS judgment. Consultant guided physician through EAS, was present for physician exam of patient and during EAS implementation. RTE judged the consultant took over part of the physician's role. |
| 2012-32  | Consultation     | A woman, 60-70 years old, with rapidly progressing lung cancer                                                                    | SCEN consultant and EAS physician in same practice. SCEN doctor did not find unbearable suffering and suggested another consultation but the physician performed EAS to the SCEN consultant's surprise.                                                                                                                                                                                                           |
| 2012-38  | Medical Care     | A man, 60-70 years old, with esophageal cancer                                                                                    | Physician used medications not permitted by the RTE for EAS. He had done this before in 2008 and had agreed to use the standard EAS drugs.                                                                                                                                                                                                                                                                        |
| 2012-39  | Medical Care     | A woman, 60-70 years old, with breast cancer                                                                                      | Physician used less than half of the recommended dose of the coma-inducing agent, but also has a previous case in which he made the same error.                                                                                                                                                                                                                                                                   |
| 2012-40  | Medical Care     | A man, 60-69 years old, with recent metastatic vertebral cancer, with paraplegia                                                  | Physician administered the barbiturate and the paralytic agent at the same time, rather than inducing the coma first.                                                                                                                                                                                                                                                                                             |
| 2013-103 | Consultation     | A woman, 60-70 years old, with gastric cancer                                                                                     | Consultant was a direct colleague of the EAS physician.                                                                                                                                                                                                                                                                                                                                                           |
| 2013-104 | Consultation     | A woman, 80-90 years old, with liver cancer                                                                                       | SCEN consultant and the physician were in the same partnership.                                                                                                                                                                                                                                                                                                                                                   |
| 2013-106 | Consultation     | A man, 80-90 years old, with COPD, heart failure, renal insufficiency, osteoarthritis, diabetes, and depression from wife's death | Consultant found DCNM because the patient was grieving. A psychiatrist then found the patient depressed but competent. The consultation criterion was not met because of the long delay between the first consultation and the EAS.                                                                                                                                                                               |
| 2013-107 | Medical Care     | A man, 70-80 years old, with mesothelioma                                                                                         | Physician used a benzodiazepine as a coma-inducer instead of thiopental.                                                                                                                                                                                                                                                                                                                                          |
| 2014-04  | Medical Care     | A woman, 70-80 years old, with metastatic lung cancer                                                                             | Patient did not die after the physician administered the first set of EAS drugs and had to order another set from a pharmacist, which took 2 hours to arrive.                                                                                                                                                                                                                                                     |
| 2015-28  | Medical Care     | A man, 80-90 years old, with metastatic cancer                                                                                    | Physician used a low dose of the coma-inducer and did not perform a coma check.                                                                                                                                                                                                                                                                                                                                   |
| 2015-29  | Medical Care     | A woman, 40-50 years old, with leukemia                                                                                           | Physician used a low dose of the coma-inducer and did not perform a coma check.                                                                                                                                                                                                                                                                                                                                   |
| 2015-81  | Medical Care     | A man, 70-80 years old, with multiple myeloma                                                                                     | Patient did not die after administration of meds, and physician left the patient to obtain backup meds, then administered the neuromuscular blocker without a second coma inducer, despite evidence that the patient was not in a full coma.                                                                                                                                                                      |
| 2016-23  | Medical Care     | A man, 80-90 years old, with Alzheimer's Disease                                                                                  | The physician used a phenobarbital beverage instead of pentobarbital and at too low a dose; thus, had to be followed with IV EAS.                                                                                                                                                                                                                                                                                 |
| 2016-24  | Medical Care     | A man, 60-70 years old, with a distant stroke and a recent stroke, leaving him bedridden.                                         | Physician injected a low dose intramuscularly (not intravenously, as required), because he did not want family to be uncomfortable at the sight of blood or an IV.                                                                                                                                                                                                                                                |
| 2016-37  | Medical Care     | A man, 60-70 years old, with lung cancer                                                                                          | Physician used a low dose of the coma-inducer and did not perform a coma check.                                                                                                                                                                                                                                                                                                                                   |

1  
2  
3  
4  
5  
6  
7  
8  
9  
10  
11  
12  
13  
14  
15  
16  
17  
18  
19  
20  
21  
22  
23  
24  
25  
26  
27  
28  
29  
30  
31  
32  
33  
34  
35  
36  
37  
38  
39  
40  
41  
42  
43  
44  
45  
46  
47  
48  
49

|                                                                                                                                                                                                                                                 |              |                                                                                  |                                                                                                                                                                                                                                                   |
|-------------------------------------------------------------------------------------------------------------------------------------------------------------------------------------------------------------------------------------------------|--------------|----------------------------------------------------------------------------------|---------------------------------------------------------------------------------------------------------------------------------------------------------------------------------------------------------------------------------------------------|
| 2016-45                                                                                                                                                                                                                                         | Consultation | A man, 70-80 years old, with sigmoid cancer                                      | Consultant was a subordinate of the physician in the same department.                                                                                                                                                                             |
| 2016-53                                                                                                                                                                                                                                         | Consultation | A man, 60-70 years old, with metastatic lung cancer                              | The SCEN consultant was contacted through the standard procedure, but turned out to be in the same partnership as the physician.                                                                                                                  |
| 2016-57                                                                                                                                                                                                                                         | Medical Care | A woman, 60-70 years old, with lung cancer                                       | Physician used a low dose of the coma-inducer and did not perform a coma check.                                                                                                                                                                   |
| 2016-86                                                                                                                                                                                                                                         | Consultation | A man, 90-100 years old, with prostate cancer, osteoarthritis, and frequent UTIs | Physician told consultant that he intended to perform EAS even if the consultant found DCNM. Placed IV before the consultation, may have pressured consultant to find the criteria met. RTE judged that the consultation was not taken seriously. |
| 2016-87                                                                                                                                                                                                                                         | Medical Care | A man, 80-90 years old, with prostate cancer and canal stenosis                  | The physician mixed up syringes and injected the neuromuscular blocker before the coma inducer.                                                                                                                                                   |
| <sup>a</sup> Abbreviations: Euthanasia and Physician-Assisted Suicide (EAS), Euthanasia Review Committee (RTE). SCEN consultants were trained by the Support and Consultation on Euthanasia in the Netherlands (SCEN) organization (see Box 1). |              |                                                                                  |                                                                                                                                                                                                                                                   |

peer review only



1  
2  
3  
4  
5  
6  
7  
8  
9  
10  
11  
12  
13  
14  
15  
16  
17  
18  
19  
20  
21  
22  
23  
24  
25  
26  
27  
28  
29  
30  
31  
32  
33  
34  
35  
36  
37  
38  
39  
40  
41  
42  
43  
44  
45  
46  
47  
48  
49

| <b>Case ID</b> | <b>Due Care Criteria Not Met</b>                                                                                                                                                                                                | <b>Patient Characteristics</b>                                                                                                           | <b>Judgment Summary</b>                                                                                                                                                                                                                                                                                                                                                                                                                                                                                                                                                                                                                                                                                                                                                                                                             |
|----------------|---------------------------------------------------------------------------------------------------------------------------------------------------------------------------------------------------------------------------------|------------------------------------------------------------------------------------------------------------------------------------------|-------------------------------------------------------------------------------------------------------------------------------------------------------------------------------------------------------------------------------------------------------------------------------------------------------------------------------------------------------------------------------------------------------------------------------------------------------------------------------------------------------------------------------------------------------------------------------------------------------------------------------------------------------------------------------------------------------------------------------------------------------------------------------------------------------------------------------------|
| 2012-8         | <ul style="list-style-type: none"> <li>• Voluntary</li> <li>• Well-considered</li> <li>• Unbearable suffering</li> <li>• No reasonable alternative</li> </ul>                                                                   | A woman, 50-60 years old, in the terminal stages of Huntington's Disease                                                                 | Patient had 7y old advance directive for EAS without trigger for implementation. Physician mentioned EAS 3y prior, but patient became troubled, said she "didn't want to 'get the needle.'" 1y prior, he brought up EAS again and patient "did not become troubled." Physician "considered this an indirect form of consent" and later took "patient's tranquil behavior" to mean she "understood what she was being told" despite the patient being incapacitated. RTE concluded, "the physician could actually not have interpreted the verbal and nonverbal behavior of the patient as a voluntary and well-considered request..." and that the description of patient's behavior was not consistent with unbearable suffering.                                                                                                  |
| 2012-17        | <ul style="list-style-type: none"> <li>• Unbearable suffering</li> <li>• No prospect of improvement</li> <li>• No reasonable alternative</li> </ul>                                                                             | A woman, over 90 years old. Had a stroke four years before death with a good neurological recovery.                                      | Patient was lonely ("alone in the world") but healthy, felt her "life was complete." Stopped eating, drinking but wanted EAS to die. Consultant claimed suffering "due to starvation" as a medical basis; physician blamed the consultant, saying he would not have provided EAS without consultant approval. RTE concluded her "suffering cannot be primarily attributed to a medically classified disease or disorder, and therefore the physician could not have come to the conclusion that it was a matter of unbearable suffering in the sense of the law... [and] that there was no other reasonable solution."                                                                                                                                                                                                              |
| 2012-33        | <ul style="list-style-type: none"> <li>• Unbearable suffering</li> <li>• Unclear judgment for no prospect of improvement</li> </ul>                                                                                             | A woman, 50-60 years old. Stable for several years after a cerebrovascular accident due to cardiac arrest, with aphasia and hemiparesis. | Patient felt isolated due to aphasia, but could communicate enough to convince doctors of desire and competence for EAS. 2 consultants disagreed about suffering: "[a]ccording to the second consultant, the unbearable nature of her suffering was also apparent from the resolve of her request for euthanasia." Physician did not keep records for last 3 months of her life and vacationed for 2 months after agreeing to provide EAS. Patient's "problematic" family also took vacation and delayed EAS. RTE stated, "In view of the long period that the patient withstood the suffering and the physician's impression that if necessary she could have waited even longer, it would have been reasonable for the physician to have discussed the unbearable nature of the patient's suffering more extensively with her..." |
| 2013-91        | <ul style="list-style-type: none"> <li>• Voluntary</li> <li>• Well-considered</li> <li>• Unbearable suffering</li> <li>• No Prospect of Improvement</li> <li>• Patient Informed</li> <li>• No Reasonable Alternative</li> </ul> | A man, 50-60 years old. Diagnosed with an esophageal carcinoma and metastatic colon cancer with little prospect of recovery.             | The EAS physician refused to fill out key parts of his report, would speak only to physicians on the RTE, and refused to answer questions even in interview, citing "physician confidentiality [sic]." "The Committee, as a result of the lack of necessary information... was not put in a position to form a reasoned picture of whether the physician acted in accordance with the due diligence requirement from Article 2 sub a-d of the Act on Reviewing the Termination of Life on Request and Assisted Suicide."                                                                                                                                                                                                                                                                                                            |
| 2014-01        | <ul style="list-style-type: none"> <li>• Voluntary</li> <li>• Well-considered</li> <li>• No Prospect of Improvement</li> <li>• No Reasonable Alternative</li> <li>• Consultation</li> </ul>                                     | A woman, 80-90 years old. Suffered from depression for about thirty years.                                                               | A generalist End of Life Clinic physician saw patient only twice over 3 weeks, did not interview patient alone or consult any psychiatrists. Told the RTE he "had not a single doubt" about patient meeting due care criteria, did not see the need to consult a psychiatrist, and was unaware of the Dutch Psychiatric Association guidelines on EAS request from psychiatric patients. The RTE determined "the physician did not act with the caution that would have been expected in the case of a request for assisted suicide from a psychiatric patient. The physician in this case should have taken more time for interviews with the patient, also not in the presence of her children. Since the physician and the consultant lacked                                                                                     |



|         |                                                                                                                                                     |                                                                                                                                                                                       |                                                                                                                                                                                                                                                                                                                                                                                                                                                                                                                                                                                                                                                                                                                                                                                                                                                                                                                                                                                                                                                                                                                                     |
|---------|-----------------------------------------------------------------------------------------------------------------------------------------------------|---------------------------------------------------------------------------------------------------------------------------------------------------------------------------------------|-------------------------------------------------------------------------------------------------------------------------------------------------------------------------------------------------------------------------------------------------------------------------------------------------------------------------------------------------------------------------------------------------------------------------------------------------------------------------------------------------------------------------------------------------------------------------------------------------------------------------------------------------------------------------------------------------------------------------------------------------------------------------------------------------------------------------------------------------------------------------------------------------------------------------------------------------------------------------------------------------------------------------------------------------------------------------------------------------------------------------------------|
|         |                                                                                                                                                     |                                                                                                                                                                                       | psychiatric expertise, the physician should also have contacted another expert.”                                                                                                                                                                                                                                                                                                                                                                                                                                                                                                                                                                                                                                                                                                                                                                                                                                                                                                                                                                                                                                                    |
| 2014-02 | <ul style="list-style-type: none"> <li>•Unbearable Suffering</li> </ul>                                                                             | A woman, 80-90 years old. Placed in a nursing home after a second cerebrovascular accident that left her with cognitive disorders and aphasia.                                        | Patient not competent, in a NH; had a 20y old advance directive, which she confirmed orally to her physician, that requested EAS if she were permanently placed in NH. NH doctor noted patient to be a “quiet and friendly woman,” refused children’s request for EAS; children turned to End of Life Clinic. The Clinic doctor saw patient twice. Consultant saw in “[the patient’s] eyes... quite clearly her despair and unhappiness” but also said it was a “very difficult case, and that the limits of the law would be sought here.” Physician “did not see any signs of unbearable suffering in the patient and based his decision exclusively on the fact that the patient was placed in a nursing home...” RTE concluded that “The mere fact that the patient permanently had to leave her own environment and be admitted to a nursing home is insufficient to assume that the suffering is unbearable... the physician—merely on the basis of the picture of the patient that was outlined to him—expended insufficient time and effort in this situation to confirm the unbearable nature of the patient’s suffering.” |
| 2014-05 | <ul style="list-style-type: none"> <li>•Unbearable suffering</li> <li>•No prospect of improvement</li> <li>•No reasonable alternative</li> </ul>    | A woman, 40-50 years old. Tinnitus for more than ten years, severe hyperacusis and neuralgia. Had history of psychiatric disorders including anorexia, PTSD, anxiety, and depression. | Patient had history of not following physician advice, had halted EAS evaluation process several times. End of Life Clinic psychiatrist wrote a triage report 6 months prior, did not address psychiatric issues. SCEN consultant surprised End of Life Clinic physician by saying no further evaluation needed and told RTE that “she wanted to prevent the patient from having to go through another interview with an independent psychiatrist.” Consultant contacted triage doctor “twice to insist that she supplement the report with conclusions regarding DSM Axis I and Axis II based on the triage.” RTE was skeptical of this retroactive “supplement.” RTE determined the End of Life Clinic physician “lacked a clear somatic diagnosis and... the physician... should have had a psychiatric examination performed... especially since the physician initially had a ‘fishy’ feeling about this request... The physician conducted inadequate research on the existence of real options to ease the patient’s suffering...”                                                                                           |
| 2015-01 | <ul style="list-style-type: none"> <li>•Well-considered Request</li> <li>•No Prospect of improvement</li> <li>•No Reasonable alternative</li> </ul> | A woman, over 90 years old. Many non-terminal conditions including macular degeneration, intestinal problems, back pain, and dysphasia.                                               | Patient went to End of Life Clinic when her own doctor refused EAS. Patient refused examination by the Clinic physician. The consultant did not think the request was well considered or the condition futile, and recommended geriatric consult, but the patient refused. End of Life Clinic physician eventually convinced the consultant to change this decision. “The Committee is of the opinion [that the physician] too easily went along with the patient’s refusal to be examined by a geriatrician.”                                                                                                                                                                                                                                                                                                                                                                                                                                                                                                                                                                                                                      |
| 2016-21 | <ul style="list-style-type: none"> <li>•No prospect of improvement</li> <li>•No reasonable alternative</li> </ul>                                   | A man, 50-60 years old. Mild Parkinson’s disease and psychiatric issues related to coping.                                                                                            | Treating psychiatrist and neurologist thought a psychological component played a role in patient’s suffering. Family physician reluctant but consulted SCEN doctor who initially thought not hopeless but told family physician to refer patient to End of Life Clinic. Clinic physician saw patient twice within a week, consulted same SCEN doctor, and without consulting new specialists deemed patient’s condition futile, contrary to what the previous specialists stated. Committee stated, “The physician was not obligated to further scrutinize the advice of the treating neurologist and the judgment of the psychiatrist other than to make accurate record of them. The physician, to reach a well-considered judgment of the hopelessness of the suffering and any treatment alternatives, must consult with the neurologist and the psychiatrist or another specialist expert in this field... The physician had to use this deliberation to                                                                                                                                                                       |

|                                                                                                                                                                                                                                                                                      |                                                                                                               |                                                    |                                                                                                                                                                                                                                                                                                                                                                                                                                                                                                                                                                                                                                                                                                                                                                                                                                                                                                                                                                                                                                                                                                                                                                                                                                                                                                                                                                                                                                                          |
|--------------------------------------------------------------------------------------------------------------------------------------------------------------------------------------------------------------------------------------------------------------------------------------|---------------------------------------------------------------------------------------------------------------|----------------------------------------------------|----------------------------------------------------------------------------------------------------------------------------------------------------------------------------------------------------------------------------------------------------------------------------------------------------------------------------------------------------------------------------------------------------------------------------------------------------------------------------------------------------------------------------------------------------------------------------------------------------------------------------------------------------------------------------------------------------------------------------------------------------------------------------------------------------------------------------------------------------------------------------------------------------------------------------------------------------------------------------------------------------------------------------------------------------------------------------------------------------------------------------------------------------------------------------------------------------------------------------------------------------------------------------------------------------------------------------------------------------------------------------------------------------------------------------------------------------------|
|                                                                                                                                                                                                                                                                                      |                                                                                                               |                                                    | check his own judgment against that of the above-named specialists.”                                                                                                                                                                                                                                                                                                                                                                                                                                                                                                                                                                                                                                                                                                                                                                                                                                                                                                                                                                                                                                                                                                                                                                                                                                                                                                                                                                                     |
| 2016-85                                                                                                                                                                                                                                                                              | <ul style="list-style-type: none"> <li>•Voluntary</li> <li>•Well-considered</li> <li>•Medical care</li> </ul> | A woman, 70-80 years old with Alzheimer’s disease. | <p>Patient lacked capacity but had an advance directive. RTE noted: “From the wording of these clauses (‘when I consider that the time is right for me’ and ‘upon my request,’)...it can be deduced that the patient, when preparing [the advance directive], assumed that she herself could and would request euthanasia at the time she chose.” The physician covertly placed a sedative into the patient’s coffee (and gave it subcutaneously also) in order “to prevent the patient from resisting the administration of the euthanasic...” However, “the patient made a withdrawing movement during the insertion of the infusion line, and sat up during the administration of the thiopental, after which she was held to prevent her from resisting further.” The physician justified her actions: “Since the patient was no longer mentally competent, [the patient’s] utterances were no longer relevant at that time...” RTE further noted, “even if the patient had said prior to the implementation that she did not want to die, the physician stated without prompting that she would have proceeded with the termination of life. ...the physician crossed a line with her actions.” Earlier in the report, the physician “emphasized that she wanted to be fully transparent regarding the manner in which the termination of life proceeded, since in the future, euthanasia might occur more frequently in incompetent patients.”</p> |
| <p><sup>a</sup> Abbreviations include Euthanasia and Physician-Assisted Suicide (EAS), Nursing Home (NH), and Euthanasia Review Committee (RTE). SCEN consultants were trained by the Support and Consultation on Euthanasia in the Netherlands (SCEN) organization (see Box 1).</p> |                                                                                                               |                                                    |                                                                                                                                                                                                                                                                                                                                                                                                                                                                                                                                                                                                                                                                                                                                                                                                                                                                                                                                                                                                                                                                                                                                                                                                                                                                                                                                                                                                                                                          |

1  
2  
3  
4  
5  
6  
7  
8  
9  
10  
11  
12  
13  
14  
15  
16  
17  
18  
19  
20  
21  
22  
23  
24  
25  
26  
27  
28  
29  
30  
31  
32  
33  
34  
35  
36  
37  
38  
39  
40  
41  
42  
43  
44  
45  
46  
47  
48  
49

1  
2  
3  
4  
5  
6  
7  
8  
9  
10  
11  
12  
13  
14  
15  
16  
17  
18  
19  
20  
21  
22  
23  
24  
25  
26  
27  
28  
29  
30  
31  
32  
33  
34  
35  
36  
37  
38  
39  
40  
41  
42  
43  
44  
45  
46  
47  
48  
49  
50  
51  
52  
53  
54  
55  
56  
57  
58  
59  
60

| <b>Criterion Not Met</b>                                                                                                                                                                                                                                                                         | <b>No. Not Met<sup>a</sup></b> | <b>(%)<sup>a</sup></b> |
|--------------------------------------------------------------------------------------------------------------------------------------------------------------------------------------------------------------------------------------------------------------------------------------------------|--------------------------------|------------------------|
| A.1 Voluntary Request                                                                                                                                                                                                                                                                            | 4                              | (13)                   |
| A.2 Well-Considered Request                                                                                                                                                                                                                                                                      | 5                              | (16)                   |
| B.1 Unbearable Suffering                                                                                                                                                                                                                                                                         | 6                              | (19)                   |
| B.2 No Prospect of Improvement <sup>b</sup>                                                                                                                                                                                                                                                      | 6                              | (19)                   |
| C. Patient Informed About Situation                                                                                                                                                                                                                                                              | 1                              | (3)                    |
| D. No Reasonable Alternative                                                                                                                                                                                                                                                                     | 7                              | (22)                   |
| E. Consulted Independent Physician                                                                                                                                                                                                                                                               | 10                             | (31)                   |
| F. Exercised Due Medical Care                                                                                                                                                                                                                                                                    | 14                             | (44)                   |
| <sup>a</sup> A given case can have multiple criteria that were not met. The percentages represent frequency of due care not met, based on total number of cases (32) as denominator.<br><sup>b</sup> One case report did not specify whether the No Prospect of Improvement requirement was met. |                                |                        |

# BMJ Open

## Euthanasia and Assisted Suicide Not Meeting Due Care Criteria in the Netherlands: A Qualitative Review of Review Committee Judgments

|                                 |                                                                                                                                            |
|---------------------------------|--------------------------------------------------------------------------------------------------------------------------------------------|
| Journal:                        | <i>BMJ Open</i>                                                                                                                            |
| Manuscript ID                   | bmjopen-2017-017628.R1                                                                                                                     |
| Article Type:                   | Research                                                                                                                                   |
| Date Submitted by the Author:   | 07-Aug-2017                                                                                                                                |
| Complete List of Authors:       | Miller, D. Gibbes; National Institutes of Health, Department of Bioethics<br>Kim, Scott; National Institutes of Health, Bioethics          |
| <b>Primary Subject Heading</b>: | Health policy                                                                                                                              |
| Secondary Subject Heading:      | Ethics, Palliative care                                                                                                                    |
| Keywords:                       | euthanasia, assisted suicide, netherlands, Health policy < HEALTH SERVICES ADMINISTRATION & MANAGEMENT, PALLIATIVE CARE, Review Committees |
|                                 |                                                                                                                                            |

SCHOLARONE™  
Manuscripts

Word Count: 4,543  
Number of Tables and Figures: 5

**Euthanasia and Assisted Suicide Not Meeting Due Care Criteria in the Netherlands:  
A Qualitative Review of Review Committee Judgments**

D Gibbes Miller, MSc, Scott Y H Kim, MD, PhD

Department of Bioethics, National Institutes of Health, 10 Center Drive, MSC 1156, Clinical Center (Building 10), Room 1C118, Bethesda, MD 20892

D Gibbes Miller  
Fellow

Scott Y H Kim  
Senior Investigator

*Correspondence to:* Scott Y H Kim, [scott.kim@nih.gov](mailto:scott.kim@nih.gov)

*Acknowledgements*

We are grateful to Frank Miller, Raymond De Vries, Trudo Lemmens, and Sophia Gibert for comments on earlier drafts.

*Disclaimer*

The opinions expressed herein are those of the authors and do not reflect the policies and positions of the National Institutes of Health, the U.S. Public Health Service, or the U.S. Department of Health and Human Services.

*Copyright*

The authors are U.S. government employees and cannot grant copyright. The National Institutes of Health publishing agreement included in this submission allows the BMJ Publishing Group Ltd to permit this article (if accepted) to be published in BMJ editions and any other BMJ PGL products and sublicences such use and exploit all subsidiary rights, as set out in its licence.

*Details of Contributors*

Both authors had full access to all of the data in this study and affirm that the manuscript is an honest, accurate, and transparent account of the study being reported; that no important aspects of the study have been omitted; and that any discrepancies from the study as planned have been explained.

*Ethics Approval*

Ethical approval was not required for this study.

*Disclosures*

This document review did not involve direct patient interaction.

1  
2  
3 *Protocol*

4 (Not applicable) All study procedures are described in the paper.  
5  
6

7 *Keywords*

8 Euthanasia, Assisted Suicide, Netherlands, Review Committees  
9  
10  
11  
12  
13  
14  
15  
16  
17  
18  
19  
20  
21  
22  
23  
24  
25  
26  
27  
28  
29  
30  
31  
32  
33  
34  
35  
36  
37  
38  
39  
40  
41  
42  
43  
44  
45  
46  
47  
48  
49  
50  
51  
52  
53  
54  
55  
56  
57  
58  
59  
60

For peer review only

1  
2  
3  
4  
5  
6  
7  
8  
9  
10  
11  
12  
13  
14  
15  
16  
17  
18  
19  
20  
21  
22  
23  
24  
25  
26  
27  
28  
29  
30  
31  
32  
33  
34  
35  
36  
37  
38  
39  
40  
41  
42  
43  
44  
45  
46  
47  
48  
49  
50  
51  
52  
53  
54  
55  
56  
57  
58  
59  
60

**Objectives:** To assess how Dutch Regional Euthanasia Review Committees (RTE) apply the euthanasia and assisted suicide (EAS) due care criteria in cases where the criteria are judged not to have been met ('due care not met,' DCNM), and to evaluate how the criteria function to set limits in Dutch EAS practice.

**Design:** A qualitative review using directed content analysis of DCNM cases in the Netherlands from 2012 to 2016 published on the RTE website (<https://www.euthanasiecommissie.nl/>) as of January 31, 2017.

**Results:** Of 33 due care not met cases identified (occurring 2012–2016), 32 cases (97%) were published online and included in the analysis. 22 cases (69%) violated only procedural criteria, relating to improper medication administration or inadequate physician consultation. 10 cases (31%) failed to meet substantive criteria, with the most common violation involving the No Reasonable Alternative [to EAS] criterion (7 cases). Most substantive cases involved controversial elements, such as EAS for psychiatric disorders or 'tired of life,' in incapacitated patients, or by physicians from advocacy organizations. Even in substantive criteria cases, the RTE's focus was procedural. The cases were more about unorthodox, unprofessional, or overconfident physician behaviors and not whether patients should have received EAS. However, in some cases, physicians knowingly pushed the limits of EAS law. Physicians from euthanasia advocacy organizations were overrepresented in substantive criteria cases. Trained EAS consultants tended to agree with or facilitate EAS in DCNM cases. Physicians and families had difficulty applying ambiguous advance directives of incapacitated patients.

**Conclusion:** As a retrospective review of physician self-reported data, the Dutch Regional Euthanasia Review Committees do not focus on whether patients should have received EAS, but instead primarily gauge whether doctors conducted EAS in a thorough, professional manner. To what extent this constitutes enforcement of strict safeguards, especially when cases contain controversial features, is not clear.

### Strengths and Limitations of This Study:

- *Strength:* This is the first in-depth analysis of the euthanasia and assisted suicide “due care not met” case reports from the Dutch Euthanasia Review Committees.
- *Strength:* 97% of the due care not met cases from 2012-2016 were included in the review.
- *Strength:* Case reports were analyzed using directed content analysis by two separate reviewers.
- *Limitation:* Case translation may have limited some of the nuances we were able to gather from the case reports.
- *Limitation:* This study did not compare “due care not met” to “due care met” case reports, and thus cannot draw comparisons between these two types of cases.



## Introduction

Euthanasia or physician-assisted suicide (EAS) is legally permitted in the Netherlands under the Termination of Life on Request and Assisted Suicide (Review Procedures) Act of 2002. Under this legislation, EAS performed by physicians is not punishable if it meets statutory due care criteria (See Boxes 1 and 2). Further, physicians are required to report all cases of EAS for review by regional euthanasia review committees (RTE committees), which retrospectively assess whether physicians complied with the criteria.

The Dutch EAS system is often cited in debates over EAS legalization in other jurisdictions. For example, in the 2015 case *Carter v. Canada (Attorney General)* overturning a federal prohibition on EAS, the Supreme Court cited existing EAS systems, including the system in the Netherlands, as evidence that risks can be minimized with legal safeguards. The Court affirmed the trial judge's opinion that "...the risks of physician-assisted death 'can be identified and very substantially minimized through a carefully-designed system' that imposes strict limits that are scrupulously monitored and enforced." [1] Evidence for these conclusions consists of quantitative surveys and death certificate reviews, supplemented by subgroup interviews. [2,3] For example, a study of EAS patients in the Netherlands from 1990-2005 did not in general find disproportionate representation of vulnerable persons. [4] These studies, however, do not provide insight into *how* the RTEs provide oversight using the due care criteria.

Some Dutch commentators state that the RTEs use the due care criteria to provide "strict limits" on EAS, pointing to "...the scrutiny of the committees and their rather rigid evaluations... So it seems, the regulations and procedures work well." [5] Yet there is an extensive discussion among Dutch doctors and researchers about the difficulty of interpreting some of the due care criteria—especially the unbearable suffering criterion. [2,6,7] For example,

1  
2  
3 a study of 2100 Dutch physicians found that, among physicians who had received a request for  
4 EAS, 25% had experienced difficulty with decision-making regarding the due care criteria, and  
5 in particular with the “unbearable and hopeless suffering” and “voluntary and well-considered”  
6 request criteria.[8] Despite this difficulty, according to the RTE annual reports, during a period  
7 (2002 to 2016) when there were 49,287 cases of EAS in the Netherlands, only 89 cases were  
8 found to be Due Care Not Met (DCNM), giving a DCNM rate of fewer than 2 cases per 1000  
9 (0.18%).[9–23]  
10  
11  
12  
13  
14  
15  
16  
17  
18  
19  
20  
21  
22  
23

#### 24 BOX 1

25  
26  
27  
28  
29 Because of the Dutch system’s commitment to transparency, summaries of RTE  
30 decisions for almost all DCNM cases since 2012 are available online. We analyzed these cases to  
31 address two questions. First, how do the RTE committees interpret and apply the due care  
32 criteria when making DCNM decisions? Second, what can this information tell us about how the  
33 retrospective review system functions as a safeguard in Dutch EAS practice?  
34  
35  
36  
37  
38  
39  
40  
41

#### 42 **Methods**

43  
44  
45 We reviewed all EAS DCNM cases that the RTE had published online as of Jan 31, 2017,  
46 which included cases from 2012 to 2016 ([https://www.euthanasiecommissie.nl/uitspraken-en-](https://www.euthanasiecommissie.nl/uitspraken-en-uitleg/o/onzorgvuldig)  
47 [uitleg/o/onzorgvuldig](https://www.euthanasiecommissie.nl/uitspraken-en-uitleg/o/onzorgvuldig)). According to the RTE, there were 10 DCNM cases in 2012, 5 cases in  
48 2013, 4 cases in 2014, 4 cases in 2015, and 10 cases in 2016,[19–23] and all but one of these  
49 cases were published on the RTE website. Thus, this study included 97% (32 of 33) of the  
50 DCNM cases from 2012 to 2016.  
51  
52  
53  
54  
55  
56  
57  
58  
59  
60

## BOX 2

The cases stated which due care criteria (see Box 2) were violated, and we followed the accepted distinction [8,24,25] between “substantive” (a through d, pertaining to patient eligibility) and “procedural” (e and f) criteria to classify the cases. The RTE case reports of cases involving the substantive criteria were quite extensive (average 4101 words) and very detailed in some cases (range 2236-8688 words). The cases involving only procedural criteria were more brief and straightforward (average 2282 words, range 1176-4166). Thus, for the procedural cases, we used online translation tools and as-needed consultations with Dutch-speaking academics to clarify passages; the 10 substantive criteria cases were translated by certified medical translators through the National Institutes of Health Library’s translation services.[26]

The case reports were analyzed using a previously described method,[26,27] through directed content analysis[28] primarily focused on reasons given by the RTEs for why each of the due care criteria had not been met, but also coding for any emergent themes and patterns. A coding scheme was developed by the authors as they independently read the reports. D.M. and S.K. independently coded all of the reports, and discrepancies were resolved through discussion. Data were entered into SPSS software for descriptive analysis only.

## **Results**

### Characteristics of the Due Care Not Met Cases

The characteristics of the patients are summarized in Table 1.

TABLE 1

The most common diagnosis was cancer (18/32, 56%). 6 cases (19%) involved neurodegenerative diseases, including Alzheimer's disease, Parkinson's disease, and Huntington's disease. There was one case (2014-01) of EAS for psychiatric reasons (bipolar depression). Many patients had more than one medical condition, including stroke, heart failure, tinnitus, vision loss, aphasia, and chronic pain, but one patient (2012-17) had no medical condition as a basis for EAS.

22 of 32 cases (69%) failed to meet only procedural criteria, while 10 cases (31%) did not meet at least one substantive criterion. (See Supplementary Table). Of the 10 substantive cases, 9 (90%) involved patients with non-cancer diagnoses and in non-terminal states (including Huntington's disease, Parkinson's disease, Alzheimer's disease, psychiatric conditions, and past stroke or cerebrovascular incident with stable recovery). In 6 cases (5 substantive, 1 procedural), the patients relied on EAS advocacy organizations (See Box 1) to provide EAS instead of their primary doctors.

Procedural Criteria (Table 2)

*Consultation* (10/32 cases, 31%). The most common reason (7 of 10 cases) for not meeting this criterion was lack of independence: the consultant (see Box 1) was already familiar with the case, had professional or financial ties to the EAS physician, or, in one case (2012-31) the consultant trained by the organization Support and Consultation on Euthanasia in the Netherlands (SCEN, see Box 1) essentially took over a case from the physician. In one case (2016-86) the EAS physician treated the consultation as immaterial, telling the consultant that he would proceed regardless of the evaluation. In another case (2013-106) the time between

1  
2  
3 consultation and EAS implementation was deemed to be too long. The psychiatric EAS case  
4  
5 (2014-01) was notable because, despite an independent consultation with a SCEN doctor, the  
6  
7 RTE determined that the physician should have obtained a specialist consultation because neither  
8  
9 the EAS physician nor the consultant was a psychiatrist.  
10  
11

12  
13 We examined disagreements between the EAS performing physician and SCEN  
14  
15 consultants: cases 2012-33 and 2016-37. In each case two consultants disagreed about whether  
16  
17 the due care criteria had been met. In case 2012-32 the consultant did not find unbearable  
18  
19 suffering, but expected the patient would eventually have it, and the physician performed EAS  
20  
21 without a second consult. In one case (2016-86) the physician pressured the consultant to find the  
22  
23 due care criteria met.  
24  
25  
26  
27

28  
29 In some cases the consultants were *more* active than the EAS physicians in facilitating  
30  
31 the EAS, in several ways: taking over key aspects of the case (2012-31); directing the physician  
32  
33 to refer the patient to an End of Life Clinic physician (See Box 1), and then acting as the  
34  
35 consultant to that End of Life Clinic physician (2016-21); and “immediately concluding” that  
36  
37 due care criteria were met “to the [EAS] physician’s surprise,” advising the physician not to seek  
38  
39 further specialty consultations (2014-05). And in case 2012-17 the physician stated that “he  
40  
41 would not have been convinced to carry out the [EAS] request if he had not received  
42  
43 ‘permission’ from the SCEN physician.”  
44  
45  
46  
47

48  
49 *Due Medical Care* (14/32, 44%). This criterion was most commonly not met because  
50  
51 physicians incorrectly used drugs, dosing regimens (too low), route of administration  
52  
53 (intramuscular instead of intravenous), or order of administration of EAS drugs (e.g. paralytic  
54  
55 before sedative). In two cases (2012-38 and 2012-39) the physicians were repeat offenders: they  
56  
57 had made similar errors in previous EAS cases. In one case (2016-85) the physician covertly  
58  
59  
60

1  
2  
3 administered a sedative, and the family restrained the resisting patient so that additional EAS  
4 agents could be given. In two cases physicians were not prepared with sufficient medications,  
5  
6 and they either left the patient (2015-81) to retrieve more medications, or had to order more  
7  
8 medication from the pharmacist after initial doses had already been administered (2014-04).  
9  
10  
11  
12  
13

## 14 15 16 17 TABLE 2 18 19

### 20 21 22 Substantive Criteria (Table 3) 23

24  
25  
26 There was one case (2013-91) that did not meet the criterion of informing the patient. In  
27 this case, the physician refused to communicate to the RTE most of the key facts of the case, and  
28 the RTE therefore deemed all substantive criteria to be not met.  
29  
30  
31

32  
33 *Voluntary (4/32, 13%) and Well-Considered Request (5/32, 16%).* Judgments of  
34 voluntariness and the well-considered request were aligned in all but one case (2015-01), in  
35 which the RTE deemed the patient's request to be voluntary but not well-considered because she  
36 refused a geriatric consultation and thus was deemed not to be fully informed. For the other  
37 cases, the reasons the criteria were not met included doubts about the applicability of an  
38 incapacitated patient's advance directive (2016-85), the failure of the physician to discuss EAS  
39 alone with the patient (2014-01), and concerns about the ability of the physician to interpret the  
40 behavior of an incapacitated patient (2012-08).  
41  
42  
43  
44  
45  
46  
47  
48  
49  
50  
51

52  
53 *Unbearable Suffering (6/32, 19%).* In applying the unbearable suffering criterion, the  
54 RTE focused on the thoroughness of the physician's evaluation. In case 2014-05 (the woman  
55  
56  
57  
58  
59  
60

1  
2  
3 with tinnitus) the RTE specified that the patient's condition could justify EAS, but stated that the  
4  
5 physicians' *process* of evaluation was not thorough. In 2 other cases (2012-8 and 2014-02), the  
6  
7 RTE doubted that unbearable suffering could be assessed given the patients' communication  
8  
9 impairments, pointing out the inappropriateness of inferring from the look in an incapacitated  
10  
11 patient's eyes or interpretations of nonverbal and verbal behaviors. In one case (2012-33) the  
12  
13 consultant stated, "The unbearable nature of her suffering was also apparent from the resolve of  
14  
15 her request for euthanasia." In this case, the RTE did not object to using the EAS request itself as  
16  
17 a basis for inferring unbearable suffering, but instead doubted that the physician could have been  
18  
19 convinced because the patient was willing to delay EAS for several months. In case 2012-17, the  
20  
21 reason for DCNM was a matter of legal definition, as the basis of the patient's suffering was not  
22  
23 a medical condition.  
24  
25  
26  
27  
28  
29

30 The RTE's discussion of the unbearable suffering criterion in other cases was instructive  
31  
32 as well. In case 2012-32, the consultant did not find unbearable suffering, but the RTE stated it  
33  
34 could "deduce" from the physician's report that the patient's suffering became unbearable by the  
35  
36 time EAS was actually performed. In two cases (2012-33 and 2014-02), the physician used "if it  
37  
38 were me" reasoning. For example, 2012-33 states, "For the physician, the crucial question was  
39  
40 whether, if he were in the patient's position, he would find the suffering unbearable and what he  
41  
42 would want then." This reasoning did not draw critical comments from the RTE.  
43  
44  
45  
46

47 *No Prospect of Improvement (6/32, 19%) and No Reasonable Alternative (7/32, 22%).*

48  
49 These two criteria were the substantive criteria that were most commonly found to be not met  
50  
51 (and occurred together in all cases but one). In one case of a Huntington's patient (2012-08), the  
52  
53 RTE deemed nursing home care to be a reasonable alternative because there was no clear trigger  
54  
55 for implementing EAS stated in the advance directive. Other reasons for not meeting these  
56  
57  
58  
59  
60

1  
2  
3  
4  
5  
6  
7  
8  
9  
10  
11  
12  
13  
14  
15  
16  
17  
18  
19  
20  
21  
22  
23  
24  
25  
26  
27  
28  
29  
30  
31  
32  
33  
34  
35  
36  
37  
38  
39  
40  
41  
42  
43  
44  
45  
46  
47  
48  
49  
50  
51  
52  
53  
54  
55  
56  
57  
58  
59  
60

futility criteria included the non-medical source of suffering (2012-17), lack of adequate reporting (2013-91), lack of a psychiatric consult for a patient (2014-01 and 2014-05), failure of the physician to critically consider a patient's refusal for further evaluation (2015-01), and physician rejection (without explanation) of the opinions of specialists who deemed that the patient did have reasonable alternatives (2016-21).

### TABLE 3

#### Unusual Behaviors of Physicians

Some of the behaviors of doctors (both EAS-providing physicians and consultants) not only formed the basis for DCNM judgments, but were notably unusual, perhaps even unprofessional. In case 2012-33 the physician did not keep medical records for the last 3 months of the patient's life. The physician in case 2013-91 refused to fill out key parts of the report form, refused to be interviewed by non-physicians on the RTE, and refused to answer key questions in person, citing patient confidentiality (despite the fact that many details were included in the consultant's report). In case 2015-01, the physician saw the patient only twice and did not examine the patient before proceeding to EAS. This physician also persuaded the consultant to revise his report with a DCM judgment, and he did not initially fully report to the RTE his EAS discussions with the patient. In case 2014-05, a psychiatrist, who had seen the patient six months before death for an End of Life Clinic triage interview, complied with the SCEN consultant's request to amend the patient's medical record with psychiatric conclusions without seeing the patient again for a psychiatric evaluation. Finally, in case 2016-86, the



1  
2  
3 physician, intending to perform EAS regardless of the consultation outcome, inserted an  
4  
5 intravenous line in the patient even before the consultant arrived.  
6  
7

8  
9 Some due medical care violations involved unusual or unprofessional behaviors, such as  
10  
11 the physician leaving the patient during EAS to obtain backup drugs (2015-81), the physician  
12  
13 ordering backup EAS drugs from a pharmacist after administering the first set (2014-04), and the  
14  
15 physician injecting the EAS drugs intramuscularly instead of intravenously, despite explicit  
16  
17 guidance to the contrary, because the physician did not want the patient's family to see blood or  
18  
19 an IV placement (2016-24).  
20  
21

### 22 23 Pushing the Legal Boundaries 24

25  
26  
27 In several cases, there were indications that the physicians or consultants involved were  
28  
29 aware they were pushing the legal boundaries in performing EAS. In case 2014-02, the  
30  
31 consultant "realized that it was a very difficult case, and that the limits of the law would be  
32  
33 sought here." In case 2016-85, in which the patient was surreptitiously given sedatives and later  
34  
35 held down in order to administer more drugs, the physician justified her actions, saying that she  
36  
37 would have performed EAS "even if the patient had said at that moment: 'I don't want to die.'"  
38  
39 The physician "highlighted the need for transparency in this case" with the reasoning that "EAS  
40  
41 might occur more frequently in incompetent patients."  
42  
43  
44  
45

46  
47 In case 2012-8, "The physician declared that it did not surprise her when she was invited  
48  
49 for an interview with the [RTE] Committee. The consultant had mentioned the possibility to  
50  
51 her." And in case 2012-17, the physician seemed to be aware of pushing the boundaries, as he  
52  
53 "confirmed... there was actually no question of a disease or disorder" in the patient, while stating  
54  
55 that he would not have performed EAS if the SCEN consultant had not granted "permission."  
56  
57  
58  
59  
60

### Prominence of EAS Advocacy Organizations

In 6 cases (6/32, 19%), physicians from EAS advocacy organizations provided EAS. The Voluntary Life Foundation[29] provided EAS in the procedural case 2012-30. In the other 5 cases, the End of Life Clinic[30] provided EAS, and all 5 cases involved substantive criteria. Thus, the End of Life Clinic provided EAS for 5 of the 10 substantive criteria cases in this study (50%). In 2016-21 the family physician referred the patient to the End of Life Clinic at the SCEN consultant's suggestion.

In 3 cases involving the End of Life Clinic (2014-01, 2014-05, and 2016-21) the RTE determined that the physicians should have consulted with specialists (psychiatrists or neurologists). Additionally, in case 2015-01 the RTE determined that the End of Life Clinic physician too easily accepted the patient's refusal of a geriatric evaluation. The RTE explicitly stated in two cases (2014-01 and 2014-02) that the End of Life Clinic physicians spent too little time evaluating the patients, and in case 2014-05, the RTE mentioned that the physician spent too little time researching alternatives to EAS.

### **Discussion**

Debates over the legalization of EAS often draw on evidence from the Netherlands to consider how laws can be tailored and enforced to create safeguards to abuse, neglect, or errors.[1] Studies of the Dutch EAS system have found little evidence of abuse[2–4] and praise the “scrutiny” of the “rather rigid evaluations.”[5] However, Dutch physicians also report difficulty in applying the EAS laws, and specifically in evaluating the substantive due care criteria.[2,6–8] Despite this difficulty, very few cases are deemed not to meet the due care criteria (0.18% of the 49,287 cases between 2002 and 2016).[9–23] Our review of DCNM cases

1  
2  
3 analyzed how the RTE interprets and applies the due care criteria, with a specific interest in how  
4 the criteria function as safeguards. There were several notable findings.  
5  
6  
7

8  
9 First, the majority of cases did not meet the due care criteria for procedural or technical  
10 reasons. 69% (22/32) of DCNM cases failed to meet only the procedural due care criteria (due  
11 medical care and consulting an independent physician). These criteria are more clearly  
12 operationalized than other criteria and do not require extensive interpretation. However, even  
13 when the substantive criteria were at issue, the RTE's focus was generally not on whether the  
14 physician made a 'correct' judgment, but on whether the physician followed a thorough *process*  
15 (i.e., whether physicians should have consulted specialists or evaluated the patient further, but  
16 not whether the patient should have received EAS). Indeed, in one case (2012-32) the RTE  
17 committee stated it could "deduce" the presence of unbearable suffering at the time of death,  
18 even though the consultant determined that the criterion was not met. In another (2014-05), the  
19 RTE specified that the patient's condition (tinnitus and hyperacusis) could justify EAS, but  
20 stated that the physicians' *process* of evaluation was not thorough.  
21  
22  
23  
24  
25  
26  
27  
28  
29  
30  
31  
32  
33  
34  
35  
36  
37

38 The RTE may focus on procedural aspects of EAS because the review process is  
39 retrospective and based on physician self-reporting, and perhaps because the RTE committees  
40 seriously consider the wording of the EAS law, which is written from the perspective of  
41 physicians (i.e., whether the physician is "satisfied" [see Box 2]).[31] In other words, the criteria  
42 are designed and applied to evaluate the procedures doctors follow (taking "due care"), and not  
43 to directly assess the actual eligibility of the patients; they appear designed to determine "was the  
44 doctor careful?" more than "was EAS appropriate in that case?" This interpretation is supported  
45 by the RTE's public statement that the purpose of the EAS legislation is: "1. to create legal  
46 certainty for doctors caught in conflicting obligations, 2. to provide transparency in the practice  
47  
48  
49  
50  
51  
52  
53  
54  
55  
56  
57  
58  
59  
60

1  
2  
3 of euthanasia and public scrutiny, and 3. to safeguard, monitor and promote the care with which  
4  
5 medical decisions about termination of life on request are taken and the quality of such decisions  
6  
7 by bringing matters into the open and applying uniform criteria in assessing every case in which  
8  
9 a doctor terminates life."[32]  
10  
11

12  
13 Given that the RTE tends to focus on the process of EAS (even for the substantive  
14  
15 criteria), it is not surprising that many of the DCNM cases involved physicians behaving in  
16  
17 seemingly unorthodox or unprofessional ways. Examples of these behaviors included inadequate  
18  
19 record keeping, repeated failures to follow standard medical procedures, incompetent use of  
20  
21 medications, and unusual interpretations of patient confidentiality. The RTE was especially  
22  
23 sensitive to incompetent use of medications given its potential to cause unnecessary suffering.  
24  
25  
26  
27

28  
29 Second, despite the RTEs' procedural focus (e.g., DCNM because of lack of  
30  
31 thoroughness), in some cases it was possible to infer that actual norms were violated, especially  
32  
33 in cases where physicians were knowingly pushing the limits of the law. In the case in which the  
34  
35 EAS physician noted that there was no medical basis (2012-17), it seems unlikely that the  
36  
37 consultant was unaware of the law's boundaries. The doctor who performed EAS on an  
38  
39 incapacitated woman by surreptitiously administering a sedative and restraining her to administer  
40  
41 additional EAS agents (case 2016-85) had intended to set a precedent for other similar EAS  
42  
43 cases that she anticipated would become more frequent.  
44  
45  
46  
47

48  
49 Physicians pushing the limits of EAS laws may reflect the fact that some doctors are also  
50  
51 advocates of EAS. This could also explain why 1 procedural case and half (5 of 10) of  
52  
53 substantive DCNM cases were performed by physicians affiliated with EAS advocacy  
54  
55 organizations, despite the fact that the organizations account for a small proportion of EAS cases  
56  
57 in the Netherlands (the End of Life Clinic was involved in less than 5%, or 1,219/25,930, of EAS  
58  
59  
60

1  
2  
3 cases in the Netherlands from 2012-2016).[19–23] Since the End of Life Clinic does focus on  
4 patients whose EAS requests are denied, this overrepresentation may reflect the complexity of  
5 those cases. But it may also indicate that physicians from the End of Life Clinic interpret and  
6 apply EAS laws more flexibly than the RTE.  
7  
8  
9  
10  
11

12  
13 Third, several cases involved EAS for incapacitated patients. In these cases, determining  
14 whether the criteria were met was complicated. Advance directive EAS clauses without clear  
15 triggers for EAS implementation leave ambiguity regarding what constitutes a ‘request for EAS’  
16 and unbearable suffering in a patient who cannot communicate.  
17  
18  
19  
20  
21  
22

23  
24 Fourth, the role of the SCEN doctors in DCNM cases was unexpected. They are specially  
25 trained and knowledgeable about the due care criteria. Thus, we anticipated that DCNM cases  
26 would generally involve EAS physicians going against the SCEN consultants’ recommendations.  
27 Indeed, we did find two cases of this (2012-32, 2016-86) but in most cases, the consultants either  
28 agreed with the EAS physician or played a more active role in facilitating the EAS. This seems  
29 consistent with the finding that general practitioners may interpret the law more restrictively than  
30 experienced consultants or RTE members.[33] This dynamic may also explain why so few EAS  
31 cases are found as DCNM: if SCEN consultants and RTE committees do not interpret the EAS  
32 law as restrictively as general practitioners, then SCEN consultants will infrequently object to  
33 EAS, and the RTE committees will be unlikely to find cases to be DCNM.  
34  
35  
36  
37  
38  
39  
40  
41  
42  
43  
44  
45  
46  
47

48 Fifth, nearly all substantive DCNM cases (9 out of 10) involved non-cancer, non-terminal  
49 conditions. Most of these cases had features that are often debated in the literature: EAS for  
50 psychiatric disorders or for ‘tired of living,’ in incapacitated patients, or by physicians affiliated  
51 with EAS advocacy organizations.  
52  
53  
54  
55  
56  
57  
58  
59  
60

1  
2  
3  
4  
5  
6  
7  
8  
9  
10  
11  
12  
13  
14  
15  
16  
17  
18  
19  
20  
21  
22  
23  
24  
25  
26  
27  
28  
29  
30  
31  
32  
33  
34  
35  
36  
37  
38  
39  
40  
41  
42  
43  
44  
45  
46  
47  
48  
49  
50  
51  
52  
53  
54  
55  
56  
57  
58  
59  
60

What lessons might be drawn from these findings? Specifically, what do these cases tell us about why there are so few DCNM cases and whether the Dutch system provides truly strict safeguards? The two questions are closely related. If the review system sets strict limits and provides scrupulous monitoring, then the extremely low rates of non-compliance would indicate a major achievement in preventing abuses and errors. An alternative explanation is that the rates are low because the system is not designed to, or cannot, provide such strict oversight.

Evaluating patients' EAS requests requires complicated judgments in implementing criteria that are intentionally open-ended, evolving, and fraught with acknowledged interpretive difficulties.[2,6–8,25] Our review suggests that the Dutch review system's primary mode of handling this difficulty is a trust-based system that focuses on the procedural thoroughness and professionalism of physicians. It is notable that even within this physician-centered system, over 20% of EAS cases are unreported.[34] It is difficult to assess what happens in those cases, but it may be that physicians performing questionable cases would have an incentive not to report (unless of course the physician wishes to set a precedent) or to interpret what they are doing as not needing to be reported.

It is striking that 9 out of 10 substantive cases involved non-terminally ill patients, and most contained controversial features such as EAS for psychiatric or 'tired of living' complaints, in incapacitated patients, or by physicians sponsored by EAS advocacy organizations. (The one substantive criteria case involved a cancer patient whose physician refused to cooperate and thus did not meet any substantive criteria). The Dutch EAS review system was implemented in the 1990s when such cases were rare. Thus, our review raises the question of whether a retrospective, trust-based review system can adequately address these new and controversial developments.

1  
2  
3  
4  
5  
6  
7  
8  
9  
10  
11  
12  
13  
14  
15  
16  
17  
18  
19  
20  
21  
22  
23  
24  
25  
26  
27  
28  
29  
30  
31  
32  
33  
34  
35  
36  
37  
38  
39  
40  
41  
42  
43  
44  
45  
46  
47  
48  
49  
50  
51  
52  
53  
54  
55  
56  
57  
58  
59  
60

There are important limitations of our study. First, we had to rely on case translations that combined professional medical translators with online translation services. This may have limited some of the nuanced detail we were able to gather from the cases. Additionally, we did not perform a comparative study between the DCM and the DCNM cases, so we cannot draw any firm conclusions about how the criteria are used and reviewed in due care met cases. For instance, it may be that the DCNM rates are low because doctors already rule out questionable cases by refusing.[35] This seems unlikely since one survey of Dutch general practitioners found an EAS refusal rate of only about 12% (which may include refusals for conscience reasons).[35] Since at least 12-17% of Dutch doctors oppose EAS per se, refusals for non-conscientious reasons is likely quite low.[36,37] Thus, the possibility that Dutch doctors are exceptionally good at weeding out ineligible cases among all requests is probably not the primary explanation for the low DCNM rate of less than 2 in 1000.

### Conclusion

35  
36  
37  
38  
39  
40  
41  
42  
43  
44  
45  
46  
47  
48  
49  
50  
51  
52  
53  
54  
55  
56  
57  
58  
59  
60

The Dutch EAS cases judged to be DCNM generally fit three categories. First, most cases are violations of procedural criteria that do not require extensive interpretation by the RTE (the consultation and due medical care criteria). These make up the majority of the cases. Second, even violations of substantive (i.e., eligibility) criteria are generally about procedural inadequacies of physicians (reflected in their unusual, unprofessional, or overconfident behaviors), rather than directly about the eligibility characteristics of patients. Third, some cases result from doctors pushing the boundaries of EAS law. Other features of DCNM cases are that in general the SCEN consultants either agreed with or facilitated these EAS cases, and that there was a high representation of physicians from euthanasia advocacy organizations. Finally, virtually all violations of substantive criteria were cases with controversial features.

1  
2  
3  
4  
5  
6  
7  
8  
9  
10  
11  
12  
13  
14  
15  
16  
17  
18  
19  
20  
21  
22  
23  
24  
25  
26  
27  
28  
29  
30  
31  
32  
33  
34  
35  
36  
37  
38  
39  
40  
41  
42  
43  
44  
45  
46  
47  
48  
49  
50  
51  
52  
53  
54  
55  
56  
57  
58  
59  
60

What can jurisdictions considering EAS laws learn from these findings? The Dutch review system places tremendous trust in its physicians. As one official Dutch report of EAS practice noted, “the review process is generally based on appreciation of the expertise and professionalism of the physician and the consultant.”[38] This trust, for the most part, is reciprocated by physicians and consultants, as shown by their transparency in the self-reports (i.e., physicians admitting that they knew they were pushing the boundaries and describing even disturbing behaviors). This culture of trust in the authorities that regulate the EAS system is likely supported by the awareness that no doctor under the current law has suffered any legal consequences for reporting cases that do not conform to the due care criteria.

Whether an EAS oversight system based on mutual trust would translate into a system with “strict limits” in other jurisdictions is an important point for discussion. In jurisdictions considering EAS laws, debates over how best to regulate the practice should focus on the goals of an oversight system. If the primary objective is to *directly* oversee that only truly eligible patients are receiving EAS, then a prospective independent assessment system (as has been proposed in the UK [39]) may be more fitting than a system that entrusts the physicians to apply difficult-to-interpret criteria and to self-judge whether their cases are reportable, without any serious consequences for violations. In the Netherlands, the data appear to raise questions about whether a trust-based retrospective review system provides adequate oversight for particularly vulnerable patients (such as psychiatric patients and incapacitated patients), especially when the EAS physician is sponsored by an advocacy organization.



1  
2  
3 *Contributorship*  
4

- 5  
6 1) Substantial contributions to the design of the work and the acquisition, analysis, and  
7 interpretation of data (DGM, SK)  
8 2) Drafting the work or revising it critically for important intellectual content (DGM, SK)  
9 3) Final approval of the version to be published (DGM, SK)  
10 4) Agreement to be accountable for all aspects of the work in ensuring that questions related to  
11 the accuracy or integrity of any part of the work are appropriately investigated and resolved  
12 (DGM, SK)  
13

14  
15  
16 *Competing Interests*

17 All authors have completed the ICMJE uniform disclosure form at  
18 [www.icmje.org/coi\\_disclosure.pdf](http://www.icmje.org/coi_disclosure.pdf) and declare no support from any organisation for the  
19 submitted work, no financial relationships with any organisations that might have an interest in  
20 the submitted work in the previous three years, and no other relationships or activities that could  
21 appear to have influenced the submitted work.  
22  
23

24  
25 *Funding*

26 This research was supported in part by the Intramural Research Program of the National  
27 Institutes of Health Clinical Center.

28 The study sponsor played no role in the conduct of this study.

29 This research was conducted independently from the funders.  
30

31  
32 *Data Sharing*

33 (Not applicable) All data analyzed are currently publicly available.  
34  
35  
36  
37  
38  
39  
40  
41  
42  
43  
44  
45  
46  
47  
48  
49  
50  
51  
52  
53  
54  
55  
56  
57  
58  
59  
60

## Bibliography

- 1 Judgments of the Supreme Court of Canada. *Carter v. Canada (Attorney General)*. 2015 SCC5. 2015. <https://scc-csc.lexum.com/scc-csc/scc-csc/en/item/14637/index.do> (accessed 14 Mar 2017).
- 2 Rietjens JAC, van der Maas PJ, Onwuteaka-Philipsen BD, *et al*. Two Decades of Research on Euthanasia from the Netherlands. What Have We Learnt and What Questions Remain? *J Bioethical Inq* 2009;**6**:271–83. doi:10.1007/s11673-009-9172-3
- 3 Norwood F, Kimsma G, Battin MP. Vulnerability and the “slippery slope” at the end-of-life: a qualitative study of euthanasia, general practice and home death in The Netherlands. *Fam Pract* 2009;**26**:472–80. doi:10.1093/fampra/cmp065
- 4 Battin MP, Heide A van der, Ganzini L, *et al*. Legal physician-assisted dying in Oregon and the Netherlands: evidence concerning the impact on patients in “vulnerable” groups. *J Med Ethics* 2007;**33**:591–7. doi:10.1136/jme.2007.022335
- 5 Kimsma GK. Death by request in The Netherlands: facts, the legal context and effects on physicians, patients and families. *Med Health Care Philos* 2010;**13**:355–61. doi:10.1007/s11019-010-9265-0
- 6 Pasman HRW, Rurup ML, Willems DL, *et al*. Concept of unbearable suffering in context of ungranted requests for euthanasia: qualitative interviews with patients and physicians. *BMJ* 2009;**339**:b4362. doi:10.1136/bmj.b4362
- 7 Hanssen-de Wolf JE, Pasman HRW, Onwuteaka-Philipsen BD. How do general practitioners assess the criteria for due care for euthanasia in concrete cases? *Health Policy* 2008;**87**:316–25. doi:10.1016/j.healthpol.2007.12.009
- 8 Buiting HM, Gevers JKM, Rietjens JAC, *et al*. Dutch criteria of due care for physician-assisted dying in medical practice: a physician perspective. *J Med Ethics* 2008;**34**:e12–e12. doi:10.1136/jme.2008.024976
- 9 Regional Euthanasia Review Committees, The Hague, the Netherlands. Annual Report 2002. <https://www.euthanasiecommissie.nl/uitspraken/jaarverslagen/2002/nlendufr/nlendufr/jaarverslag-2002> (accessed 19 Sep 2016).
- 10 Regional Euthanasia Review Committees, The Hague, the Netherlands. Annual Report 2003. <https://www.euthanasiecommissie.nl/uitspraken/jaarverslagen/2003/nl-en-du/nl-en-du/jaarverslag-2003> (accessed 19 Sep 2016).
- 11 Regional Euthanasia Review Committees, The Hague, the Netherlands. Annual Report 2004. <https://www.euthanasiecommissie.nl/uitspraken/jaarverslagen/2004/nl-en-du-fr/nl-en-du-fr/jaarverslag-2004> (accessed 19 Sep 2016).
- 12 Regional Euthanasia Review Committees, The Hague, the Netherlands. Annual Report 2005. <https://www.euthanasiecommissie.nl/uitspraken/jaarverslagen/2005/nl-en-du-fr/nl-en-du-fr/jaarverslag-2005> (accessed 19 Sep 2016).

- 1  
2  
3 13 Regional Euthanasia Review Committees, The Hague, the Netherlands. Annual Report 2006.  
4 [https://www.euthanasiecommissie.nl/uitspraken/jaarverslagen/2006/nl-en-du-fr/nl-en-du-](https://www.euthanasiecommissie.nl/uitspraken/jaarverslagen/2006/nl-en-du-fr/nl-en-du-fr/jaarverslag-2006)  
5 [fr/jaarverslag-2006](https://www.euthanasiecommissie.nl/uitspraken/jaarverslagen/2006/nl-en-du-fr/nl-en-du-fr/jaarverslag-2006) (accessed 19 Sep 2016).  
6  
7  
8 14 Regional Euthanasia Review Committees, The Hague, the Netherlands. Annual Report 2007.  
9 [https://www.euthanasiecommissie.nl/uitspraken/jaarverslagen/2007/nl-en-du-fr/nl-en-du-](https://www.euthanasiecommissie.nl/uitspraken/jaarverslagen/2007/nl-en-du-fr/nl-en-du-fr/jaarverslag-2007)  
10 [fr/jaarverslag-2007](https://www.euthanasiecommissie.nl/uitspraken/jaarverslagen/2007/nl-en-du-fr/nl-en-du-fr/jaarverslag-2007) (accessed 19 Sep 2016).  
11  
12 15 Regional Euthanasia Review Committees, The Hague, the Netherlands. Annual Report 2008.  
13 [https://www.euthanasiecommissie.nl/uitspraken/jaarverslagen/2008/nl-en-du-fr/nl-en-du-](https://www.euthanasiecommissie.nl/uitspraken/jaarverslagen/2008/nl-en-du-fr/nl-en-du-fr/jaarverslag-2008)  
14 [fr/jaarverslag-2008](https://www.euthanasiecommissie.nl/uitspraken/jaarverslagen/2008/nl-en-du-fr/nl-en-du-fr/jaarverslag-2008) (accessed 19 Sep 2016).  
15  
16 16 Regional Euthanasia Review Committees, The Hague, the Netherlands. Annual Report 2009.  
17 [https://www.euthanasiecommissie.nl/uitspraken/jaarverslagen/2009/nl-en-du-fr/nl-en-du-](https://www.euthanasiecommissie.nl/uitspraken/jaarverslagen/2009/nl-en-du-fr/nl-en-du-fr/jaarverslag-2009)  
18 [fr/jaarverslag-2009](https://www.euthanasiecommissie.nl/uitspraken/jaarverslagen/2009/nl-en-du-fr/nl-en-du-fr/jaarverslag-2009) (accessed 19 Sep 2016).  
19  
20 17 Regional Euthanasia Review Committees, The Hague, the Netherlands. Annual Report 2010.  
21 [https://www.euthanasiecommissie.nl/de-toetsingscommissies/uitspraken/jaarverslagen/2010/nl-en-du-](https://www.euthanasiecommissie.nl/de-toetsingscommissies/uitspraken/jaarverslagen/2010/nl-en-du-fr/nl-en-du-fr/jaarverslag-2010)  
22 [fr/nl-en-du-fr/jaarverslag-2010](https://www.euthanasiecommissie.nl/de-toetsingscommissies/uitspraken/jaarverslagen/2010/nl-en-du-fr/nl-en-du-fr/jaarverslag-2010) (accessed 19 Sep 2016).  
23  
24 18 Regional Euthanasia Review Committees, The Hague, the Netherlands. Annual Report 2011.  
25 [https://www.euthanasiecommissie.nl/de-toetsingscommissies/uitspraken/jaarverslagen/2011/nl-en-du-](https://www.euthanasiecommissie.nl/de-toetsingscommissies/uitspraken/jaarverslagen/2011/nl-en-du-fr/nl-en-du-fr/jaarverslag-2011)  
26 [fr/nl-en-du-fr/jaarverslag-2011](https://www.euthanasiecommissie.nl/de-toetsingscommissies/uitspraken/jaarverslagen/2011/nl-en-du-fr/nl-en-du-fr/jaarverslag-2011) (accessed 19 Sep 2016).  
27  
28 19 Regional Euthanasia Review Committees, The Hague, the Netherlands. Annual Report 2012.  
29 [https://www.euthanasiecommissie.nl/uitspraken/jaarverslagen/2012/nl-en-du-fr/nl-en-du-](https://www.euthanasiecommissie.nl/uitspraken/jaarverslagen/2012/nl-en-du-fr/nl-en-du-fr/jaarverslag-2012)  
30 [fr/jaarverslag-2012](https://www.euthanasiecommissie.nl/uitspraken/jaarverslagen/2012/nl-en-du-fr/nl-en-du-fr/jaarverslag-2012) (accessed 19 Sep 2016).  
31  
32 20 Regional Euthanasia Review Committees, The Hague, the Netherlands. Annual Report 2013.  
33 [https://www.euthanasiecommissie.nl/uitspraken/jaarverslagen/2013/nl-en-du-fr/nl-en-du-](https://www.euthanasiecommissie.nl/uitspraken/jaarverslagen/2013/nl-en-du-fr/nl-en-du-fr/jaarverslag-2013)  
34 [fr/jaarverslag-2013](https://www.euthanasiecommissie.nl/uitspraken/jaarverslagen/2013/nl-en-du-fr/nl-en-du-fr/jaarverslag-2013) (accessed 19 Sep 2016).  
35  
36 21 Regional Euthanasia Review Committees, The Hague, the Netherlands. Annual Report 2014.  
37 [https://www.euthanasiecommissie.nl/de-](https://www.euthanasiecommissie.nl/de-toetsingscommissies/uitspraken/jaarverslagen/2014/nl/nl/jaarverslag-2014)  
38 [toetsingscommissies/uitspraken/jaarverslagen/2014/nl/nl/jaarverslag-2014](https://www.euthanasiecommissie.nl/de-toetsingscommissies/uitspraken/jaarverslagen/2014/nl/nl/jaarverslag-2014) (accessed 19 Sep 2016).  
39  
40 22 Regional Euthanasia Review Committees, The Hague, the Netherlands. Annual Report 2015.  
41 [https://www.euthanasiecommissie.nl/de-](https://www.euthanasiecommissie.nl/de-toetsingscommissies/uitspraken/jaarverslagen/2015/april/26/jaarverslag-2015)  
42 [toetsingscommissies/uitspraken/jaarverslagen/2015/april/26/jaarverslag-2015](https://www.euthanasiecommissie.nl/de-toetsingscommissies/uitspraken/jaarverslagen/2015/april/26/jaarverslag-2015) (accessed 19 Sep 2016).  
43  
44 23 Regional Euthanasia Review Committees, The Hague, the Netherlands. Annual Report 2016.  
45 <https://www.euthanasiecommissie.nl/uitspraken/jaarverslagen/2016/april/12/jaarverslag-2016>  
46 <https://www.euthanasiecommissie.nl/uitspraken/jaarverslagen/2016/april/12/jaarverslag-2016>  
47 (accessed 25 Apr 2017).  
48  
49 24 Onwuteaka-Philipsen BD, Gevers JKM, van der Heide A, *et al*. Third Evaluation: Termination of  
50 Life on Request and Assisted Suicide. The Hague: ZonMw 2017.  
51 <https://www.euthanasiecommissie.nl/uitspraken/jaarverslagen/2016/april/12/jaarverslag-2016>  
52 (accessed 25 Apr 2017).  
53  
54 25 Onwuteaka-Philipsen BD, Gevers JKM, van der Heide A, *et al*. Evaluation: Termination of Life  
55 on Request and Assisted Suicide. The Hague: ZonMw 2007.  
56  
57  
58  
59  
60

1  
2  
3  
4  
5  
6  
7  
8  
9  
10  
11  
12  
13  
14  
15  
16  
17  
18  
19  
20  
21  
22  
23  
24  
25  
26  
27  
28  
29  
30  
31  
32  
33  
34  
35  
36  
37  
38  
39  
40  
41  
42  
43  
44  
45  
46  
47  
48  
49  
50  
51  
52  
53  
54  
55  
56  
57  
58  
59  
60

<https://www.euthanasiecommissie.nl/uitspraken/jaarverslagen/2016/april/12/jaarverslag-2016>  
(accessed 25 Apr 2017).

- 26 Kim SYH, De Vries RG, Peteet JR. Euthanasia and Assisted Suicide of Patients With Psychiatric Disorders in the Netherlands 2011 to 2014. *JAMA Psychiatry* 2016;**73**:362–8. doi:10.1001/jamapsychiatry.2015.2887
- 27 Doernberg SN, Peteet JR, Kim SYH. Capacity Evaluations of Psychiatric Patients Requesting Assisted Death in the Netherlands. *Psychosomatics* 2016;**57**:556–65. doi:10.1016/j.psych.2016.06.005
- 28 Hsieh H-F, Shannon SE. Three Approaches to Qualitative Content Analysis. *Qual Health Res* 2005;**15**:1277–88. doi:10.1177/1049732305276687
- 29 SLK. Stichting Vrijwillig Leven doneert aan Levenseindekliniek. Levenseinde Klin. 2015. <http://www.levenseindekliniek.nl/blog/2015/05/13/stichting-vrijwillig-leven-doneert-aan-levenseindekliniek/> (accessed 16 Mar 2017).
- 30 Levenseindekliniek. <https://www.levenseindekliniek.nl/en/> (accessed 23 Feb 2017).
- 31 Regional Euthanasia Review Committees, The Hague, the Netherlands. Code of Practice. 2015. <https://www.euthanasiecommissie.nl/de-toetsingscommissies/uitspraken/brochures/brochures/code-of-practice/1/code-of-practice> (accessed 19 Sep 2016).
- 32 Regionale Toetsingscommissies Euthanasie. Euthanasia: Q and A: The Termination of Life on Request and Assisted Suicide (Review Procedures) Act in practice. 2016. <https://www.euthanasiecommissie.nl/uitspraken/publicaties/faq-engels/faq/faq/frequently-asked-questions> (accessed 28 Feb 2017).
- 33 Rietjens JAC, van Tol DG, Schermer M, *et al.* Judgement of suffering in the case of a euthanasia request in The Netherlands. *J Med Ethics* 2009;**35**:502–7. doi:10.1136/jme.2008.028779
- 34 Onwuteaka-Philipsen BD, Brinkman-Stoppelenburg A, Penning C, *et al.* Trends in end-of-life practices before and after the enactment of the euthanasia law in the Netherlands from 1990 to 2010: a repeated cross-sectional survey. *The Lancet* 2012;**380**:908–15. doi:10.1016/S0140-6736(12)61034-4
- 35 Jansen-van der Weide MC, Onwuteaka-Philipsen BD, van der Wal G. Granted, Undecided, Withdrawn, and Refused Requests for Euthanasia and Physician-Assisted Suicide. *Arch Intern Med* 2005;**165**:1698–704. doi:10.1001/archinte.165.15.1698
- 36 Kouwenhoven PS, Raijmakers NJ, Delden JJ van, *et al.* Opinions of health care professionals and the public after eight years of euthanasia legislation in the Netherlands: A mixed methods approach. *Palliat Med* 2013;**27**:273–80. doi:10.1177/0269216312448507
- 37 Rietjens JAC, van der Heide A, Onwuteaka-Philipsen BD, *et al.* A comparison of attitudes towards end-of-life decisions: Survey among the Dutch general public and physicians. *Soc Sci Med* 2005;**61**:1723–32. doi:10.1016/j.socscimed.2005.03.024
- 38 van der Heide A, Legemaate J, Onwuteaka-Philipsen B, *et al.* Second Evaluation: Termination of Life on Request and Assisted Suicide. The Hague: ZonMw 2012.

1  
2  
3  
4  
5  
6  
7  
8  
9  
10  
11  
12  
13  
14  
15  
16  
17  
18  
19  
20  
21  
22  
23  
24  
25  
26  
27  
28  
29  
30  
31  
32  
33  
34  
35  
36  
37  
38  
39  
40  
41  
42  
43  
44  
45  
46  
47  
48  
49  
50  
51  
52  
53  
54  
55  
56  
57  
58  
59  
60

<https://www.rijksoverheid.nl/documenten/rapporten/2012/12/18/tweede-evaluatie-wet-toetsing-levensbeeindiging-op-verzoek-en-hulp-bij-zelfdoding> (accessed 25 Apr 2017).

39 Rob Marris. Assisted Dying (No. 2) Bill 2015-16. <http://services.parliament.uk/bills/2015-16/assisteddyingno2.html> (accessed 1 Aug 2017).

40 Griffiths J, Weyers H, Adams M. *Euthanasia and Law in Europe*. 2nd ed. Portland OR: : Hart Publishing 2008.

41 Van Wesemael Y, Cohen J, Onwuteaka-Philipsen BD, *et al*. Establishing specialized health services for professional consultation in euthanasia: experiences in the Netherlands and Belgium. *BMC Health Serv Res* 2009;**9**:220. doi:10.1186/1472-6963-9-220

42 Jansen-van der Weide MC, Onwuteaka-Philipsen BD, van der Wal G. Quality of consultation and the project “Support and Consultation on Euthanasia in the Netherlands” (SCEN). *Health Policy* 2007;**80**:97–106. doi:10.1016/j.healthpol.2006.03.005

43 Levenseindekliniek. Euthanasia in the Netherlands. <https://www.levenseindekliniek.nl/en/euthanasia-in-the-netherlands/> (accessed 28 Feb 2017).

44 Sheldon T. Mobile “life’s end” teams start work in Netherlands. *BMJ* 2012;**344**:e1681. doi:10.1136/bmj.e1681

45 Snijdewind MC, Willems DL, Deliens L, *et al*. A study of the first year of the end-of-life clinic for physician-assisted dying in the netherlands. *JAMA Intern Med* 2015;**175**:1633–40. doi:10.1001/jamainternmed.2015.3978

Box 1: Brief Background on Euthanasia and Physician-Assisted Suicide Practice and Regulation in the Netherlands

The practice of legally protected euthanasia or assisted suicide (EAS) has been in existence for several decades in the Netherlands, although formal legislation was not enacted until 2002 with the Termination of Life on Request and Assisted Suicide (Review Procedures) Act.[40] Under the law, the Dutch regional euthanasia review committees (Regionale Toetsingscommissies Euthanasie [RTE]) review all EAS reports to determine whether the notifying physicians (physicians who performed EAS) acted in accordance with the statutory due care criteria laid out in section 2 of the EAS legislation (Box 2). The RTE publishes a selection of their reports to provide “transparency and auditability” of EAS practice and “to make clear what options the law gives physicians.”(p4)

In 1997, the Royal Dutch Medical Association formed the Support and Consultation on Euthanasia in the Netherlands (SCEN) to professionalize the process of EAS consultations.[41] SCEN is a formal network of physicians who are trained to provide independent consultations for physicians receiving EAS requests.[42] SCEN physicians evaluate patients requesting EAS to determine if the due care criteria are met, and provide non-binding reports to the physician performing EAS as a means of improving the quality of EAS practice. They usually serve as the legally required independent physician EAS consultant but can dispense less formal advice and assistance. SCEN receives financial support from the Dutch government.[41]

In March 2012, a new organization called the End-of-Life Clinic (Levensindekliniek) began to provide EAS, primarily to patients whose own physicians had declined to perform EAS. It consists of mobile teams made up of a physician and nurse and is funded by Right to Die NL (Nederlandse Vereniging voor een Vrijwillig Levensinde [Dutch Association for a Voluntary End of Life]), a euthanasia advocacy organization.[43–45]

1  
2  
3  
4  
5  
6  
7  
8  
9  
10  
11  
12  
13  
14  
15  
16  
17  
18  
19  
20  
21  
22  
23  
24  
25  
26  
27  
28  
29  
30  
31  
32  
33  
34  
35  
36  
37  
38  
39  
40  
41  
42  
43  
44  
45  
46  
47  
48  
49  
50  
51  
52  
53  
54  
55  
56  
57  
58  
59  
60

Box 2: Dutch Euthanasia and Physician-Assisted Suicide Due Care Criteria<sup>1</sup>

The RTE committees examine retrospectively whether the attending physician acted in accordance with the statutory due care criteria laid out in section 2 of [the Termination of Life on Request and Assisted Suicide (Review Procedures) Act]. As stated in the RTE Code of Practice,[31] (p. 6) these criteria require that a physician performing EAS must:

- a. be satisfied that the patient's request is voluntary and well-considered;
- b. be satisfied that the patient's suffering is unbearable, with no prospect of improvement;<sup>ii</sup>
- c. have informed the patient about his situation and his prognosis;
- d. have come to the conclusion, together with the patient, that there is no reasonable alternative in the patient's situation;
- e. have consulted at least one other, independent physician, who must see the patient and give a written opinion on whether the due care criteria set out in (a) to (d) have been fulfilled;
- f. exercise due medical care and attention in terminating the patient's life or assisting in his suicide.

<sup>1</sup>The first four criteria pertaining to patient eligibility are called 'substantive' criteria and the last two are called 'procedural' criteria in official government reports and the literature. [8,24,25]

<sup>ii</sup> Criteria a and b each have two components which the RTE committees evaluate. These requirements will be treated independently from one another and discussed separately. For example, criterion a consists of the requirement that the EAS request must be voluntary, and the separate requirement that the EAS request must be well-considered. We follow the RTE committees' convention of considering these requirements as distinct judgments.

For peer review only - <http://bmjopen.bmj.com/site/about/guidelines.xhtml>



1  
2  
3  
4  
5  
6  
7  
8  
9  
10  
11  
12  
13  
14  
15  
16  
17  
18  
19  
20  
21  
22  
23  
24  
25  
26  
27  
28  
29  
30  
31  
32  
33  
34  
35  
36  
37  
38  
39  
40  
41  
42  
43  
44  
45  
46  
47  
48  
49  
50  
51  
52  
53  
54  
55  
56  
57  
58  
59  
60

| <b>Characteristic</b>                                                                                                                                                                                    | <b>No.</b> | <b>(%)</b> |
|----------------------------------------------------------------------------------------------------------------------------------------------------------------------------------------------------------|------------|------------|
| Women                                                                                                                                                                                                    | 18         | (56)       |
| Age Group, y <sup>a</sup>                                                                                                                                                                                |            |            |
| 40-50                                                                                                                                                                                                    | 2          | (6)        |
| 50-60                                                                                                                                                                                                    | 4          | (13)       |
| 60-70                                                                                                                                                                                                    | 9          | (28)       |
| 70-80                                                                                                                                                                                                    | 5          | (16)       |
| 80-90                                                                                                                                                                                                    | 9          | (28)       |
| 90+                                                                                                                                                                                                      | 3          | (9)        |
| Substantive Criteria Case                                                                                                                                                                                | 10         | (31)       |
| EAS Advocacy Organization Case                                                                                                                                                                           | 6          | (19)       |
| Primary Doctor Refused to Provide EAS                                                                                                                                                                    | 6          | (19)       |
| Number of Doctors Involved in EAS                                                                                                                                                                        |            |            |
| 2                                                                                                                                                                                                        | 20         | (63)       |
| 3                                                                                                                                                                                                        | 10         | (31)       |
| 4                                                                                                                                                                                                        | 2          | (6)        |
| Number of Official Consultants                                                                                                                                                                           |            |            |
| 1                                                                                                                                                                                                        | 27         | (84)       |
| 2                                                                                                                                                                                                        | 5          | (16)       |
| Number of SCEN Consultants                                                                                                                                                                               |            |            |
| 0                                                                                                                                                                                                        | 2          | (6)        |
| 1                                                                                                                                                                                                        | 26         | (81)       |
| 2                                                                                                                                                                                                        | 4          | (13)       |
| Disagreement between doctors Involved                                                                                                                                                                    | 5          | (16)       |
| <sup>a</sup> These are categories used in most of the reports. Some 2012 case reports used non-overlapping age categories (e.g., 40-49 years). The 2012 cases have been converted to the current format. |            |            |



| <b>Case ID</b> | <b>Criteria Not Met</b> | <b>Patient Characteristics</b>                                                                                                    | <b>Judgment Summary</b>                                                                                                                                                                                                                                                                                                                                                                                           |
|----------------|-------------------------|-----------------------------------------------------------------------------------------------------------------------------------|-------------------------------------------------------------------------------------------------------------------------------------------------------------------------------------------------------------------------------------------------------------------------------------------------------------------------------------------------------------------------------------------------------------------|
| 2012-30        | Consultation            | A woman, 80-89, with Parkinson's Disease, stroke, dysarthria, and incontinence                                                    | GP did not find patient to meet unbearable suffering criterion. Patient turned to Foundation for Voluntary Life (SVL); consultant, also from SVL, was already involved in the case (previously reviewed patient's file and discussed it with the physician), thus was not independent. Consultant also avoided the patient's GP.                                                                                  |
| 2012-31        | Consultation            | A woman, 80-89, with rapidly-progressing Alzheimer's Disease, pain, and vision problems                                           | GP conscientiously objected. EAS-providing physician inexperienced with EAS referred patient to an experienced SCEN consultant. Physician only evaluated the clinical status of patient, relied on consultant's EAS judgment. Consultant guided physician through EAS, was present for physician exam of patient and during EAS implementation. RTE judged the consultant took over part of the physician's role. |
| 2012-32        | Consultation            | A woman, 60-70 years old, with rapidly progressing lung cancer                                                                    | SCEN consultant and EAS physician in same practice. SCEN doctor did not find unbearable suffering and suggested another consultation but the physician performed EAS to the SCEN consultant's surprise.                                                                                                                                                                                                           |
| 2012-38        | Medical Care            | A man, 60-70 years old, with esophageal cancer                                                                                    | Physician used medications not permitted by the RTE for EAS. He had done this before in 2008 and had agreed to use the standard EAS drugs.                                                                                                                                                                                                                                                                        |
| 2012-39        | Medical Care            | A woman, 60-70 years old, with breast cancer                                                                                      | Physician used less than half of the recommended dose of the coma-inducing agent, but also has a previous case in which he made the same error.                                                                                                                                                                                                                                                                   |
| 2012-40        | Medical Care            | A man, 60-69 years old, with recent metastatic vertebral cancer, with paraplegia                                                  | Physician administered the barbiturate and the paralytic agent at the same time, rather than inducing the coma first.                                                                                                                                                                                                                                                                                             |
| 2013-103       | Consultation            | A woman, 60-70 years old, with gastric cancer                                                                                     | Consultant was a direct colleague of the EAS physician.                                                                                                                                                                                                                                                                                                                                                           |
| 2013-104       | Consultation            | A woman, 80-90 years old, with liver cancer                                                                                       | SCEN consultant and the physician were in the same partnership.                                                                                                                                                                                                                                                                                                                                                   |
| 2013-106       | Consultation            | A man, 80-90 years old, with COPD, heart failure, renal insufficiency, osteoarthritis, diabetes, and depression from wife's death | Consultant found DCNM because the patient was grieving. A psychiatrist then found the patient depressed but competent. The consultation criterion was not met because of the long delay between the first consultation and the EAS.                                                                                                                                                                               |
| 2013-107       | Medical Care            | A man, 70-80 years old, with mesothelioma                                                                                         | Physician used a benzodiazepine as a coma-inducer instead of thiopental.                                                                                                                                                                                                                                                                                                                                          |
| 2014-04        | Medical Care            | A woman, 70-80 years old, with metastatic lung cancer                                                                             | Patient did not die after the physician administered the first set of EAS drugs and had to order another set from a pharmacist, which took 2 hours to arrive.                                                                                                                                                                                                                                                     |
| 2015-28        | Medical Care            | A man, 80-90 years old, with metastatic cancer                                                                                    | Physician used a low dose of the coma-inducer and did not perform a coma check.                                                                                                                                                                                                                                                                                                                                   |
| 2015-29        | Medical Care            | A woman, 40-50 years old, with leukemia                                                                                           | Physician used a low dose of the coma-inducer and did not perform a coma check.                                                                                                                                                                                                                                                                                                                                   |
| 2015-81        | Medical Care            | A man, 70-80 years old, with multiple myeloma                                                                                     | Patient did not die after administration of meds, and physician left the patient to obtain backup meds, then administered the neuromuscular blocker without a second coma inducer, despite evidence that the patient was not in a full coma.                                                                                                                                                                      |
| 2016-23        | Medical Care            | A man, 80-90 years old, with Alzheimer's Disease                                                                                  | The physician used a phenobarbital beverage instead of pentobarbital and at too low a dose; thus, had to be followed with IV EAS.                                                                                                                                                                                                                                                                                 |
| 2016-24        | Medical Care            | A man, 60-70 years old, with a distant stroke and a recent stroke, leaving him bedridden.                                         | Physician injected a low dose intramuscularly (not intravenously, as required), because he did not want family to be uncomfortable at the sight of blood or an IV.                                                                                                                                                                                                                                                |
| 2016-37        | Medical Care            | A man, 60-70 years old, with lung cancer                                                                                          | Physician used a low dose of the coma-inducer and did not perform a coma check.                                                                                                                                                                                                                                                                                                                                   |

|                                                                                                                                                                                                                                                 |              |                                                                                  |                                                                                                                                                                                                                                                   |
|-------------------------------------------------------------------------------------------------------------------------------------------------------------------------------------------------------------------------------------------------|--------------|----------------------------------------------------------------------------------|---------------------------------------------------------------------------------------------------------------------------------------------------------------------------------------------------------------------------------------------------|
| 2016-45                                                                                                                                                                                                                                         | Consultation | A man, 70-80 years old, with sigmoid cancer                                      | Consultant was a subordinate of the physician in the same department.                                                                                                                                                                             |
| 2016-53                                                                                                                                                                                                                                         | Consultation | A man, 60-70 years old, with metastatic lung cancer                              | The SCEN consultant was contacted through the standard procedure, but turned out to be in the same partnership as the physician.                                                                                                                  |
| 2016-57                                                                                                                                                                                                                                         | Medical Care | A woman, 60-70 years old, with lung cancer                                       | Physician used a low dose of the coma-inducer and did not perform a coma check.                                                                                                                                                                   |
| 2016-86                                                                                                                                                                                                                                         | Consultation | A man, 90-100 years old, with prostate cancer, osteoarthritis, and frequent UTIs | Physician told consultant that he intended to perform EAS even if the consultant found DCNM. Placed IV before the consultation, may have pressured consultant to find the criteria met. RTE judged that the consultation was not taken seriously. |
| 2016-87                                                                                                                                                                                                                                         | Medical Care | A man, 80-90 years old, with prostate cancer and canal stenosis                  | The physician mixed up syringes and injected the neuromuscular blocker before the coma inducer.                                                                                                                                                   |
| <sup>a</sup> Abbreviations: Euthanasia and Physician-Assisted Suicide (EAS), Euthanasia Review Committee (RTE). SCEN consultants were trained by the Support and Consultation on Euthanasia in the Netherlands (SCEN) organization (see Box 1). |              |                                                                                  |                                                                                                                                                                                                                                                   |

**Table 3. Substantive Due Care Criteria Cases<sup>a</sup>**

| Case ID | Due Care Criteria Not Met                                                                                                                                                                                                 | Patient Characteristics                                                                                                                  | Judgment Summary                                                                                                                                                                                                                                                                                                                                                                                                                                                                                                                                                                                                                                                                                                                                                                                                                    |
|---------|---------------------------------------------------------------------------------------------------------------------------------------------------------------------------------------------------------------------------|------------------------------------------------------------------------------------------------------------------------------------------|-------------------------------------------------------------------------------------------------------------------------------------------------------------------------------------------------------------------------------------------------------------------------------------------------------------------------------------------------------------------------------------------------------------------------------------------------------------------------------------------------------------------------------------------------------------------------------------------------------------------------------------------------------------------------------------------------------------------------------------------------------------------------------------------------------------------------------------|
| 2012-8  | <ul style="list-style-type: none"> <li>•Voluntary</li> <li>•Well-considered</li> <li>•Unbearable suffering</li> <li>•No reasonable alternative</li> </ul>                                                                 | A woman, 50-60 years old, in the terminal stages of Huntington’s Disease                                                                 | Patient had 7y old advance directive for EAS without trigger for implementation. Physician mentioned EAS 3y prior, but patient became troubled, said she “didn’t want to ‘get the needle.’” 1y prior, he brought up EAS again and patient “did not become troubled.” Physician “considered this an indirect form of consent” and later took “patient’s tranquil behavior” to mean she “understood what she was being told” despite the patient being incapacitated. RTE concluded, “the physician could actually not have interpreted the verbal and nonverbal behavior of the patient as a voluntary and well-considered request...” and that the description of patient’s behavior was not consistent with unbearable suffering.                                                                                                  |
| 2012-17 | <ul style="list-style-type: none"> <li>•Unbearable suffering</li> <li>•No prospect of improvement</li> <li>•No reasonable alternative</li> </ul>                                                                          | A woman, over 90 years old. Had a stroke four years before death with a good neurological recovery.                                      | Patient was lonely (“alone in the world”) but healthy, felt her “life was complete.” Stopped eating, drinking but wanted EAS to die. Consultant claimed suffering “due to starvation” as a medical basis; physician blamed the consultant, saying he would not have provided EAS without consultant approval. RTE concluded her “suffering cannot be primarily attributed to a medically classified disease or disorder, and therefore the physician could not have come to the conclusion that it was a matter of unbearable suffering in the sense of the law... [and] that there was no other reasonable solution.”                                                                                                                                                                                                              |
| 2012-33 | <ul style="list-style-type: none"> <li>•Unbearable suffering</li> <li>•Unclear judgment for no prospect of improvement</li> </ul>                                                                                         | A woman, 50-60 years old. Stable for several years after a cerebrovascular accident due to cardiac arrest, with aphasia and hemiparesis. | Patient felt isolated due to aphasia, but could communicate enough to convince doctors of desire and competence for EAS. 2 consultants disagreed about suffering: “[a]ccording to the second consultant, the unbearable nature of her suffering was also apparent from the resolve of her request for euthanasia.” Physician did not keep records for last 3 months of her life and vacationed for 2 months after agreeing to provide EAS. Patient’s “problematic” family also took vacation and delayed EAS. RTE stated, “In view of the long period that the patient withstood the suffering and the physician’s impression that if necessary she could have waited even longer, it would have been reasonable for the physician to have discussed the unbearable nature of the patient’s suffering more extensively with her...” |
| 2013-91 | <ul style="list-style-type: none"> <li>•Voluntary</li> <li>•Well-considered</li> <li>•Unbearable suffering</li> <li>•No Prospect of Improvement</li> <li>•Patient Informed</li> <li>•No Reasonable Alternative</li> </ul> | A man, 50-60 years old. Diagnosed with an esophageal carcinoma and metastatic colon cancer with little prospect of recovery.             | The EAS physician refused to fill out key parts of his report, would speak only to physicians on the RTE, and refused to answer questions even in interview, citing “physician confidentiality [sic].” “The Committee, as a result of the lack of necessary information... was not put in a position to form a reasoned picture of whether the physician acted in accordance with the due diligence requirement from Article 2 sub a-d of the Act on Reviewing the Termination of Life on Request and Assisted Suicide.”                                                                                                                                                                                                                                                                                                            |
| 2014-01 | <ul style="list-style-type: none"> <li>•Voluntary</li> <li>•Well-considered</li> <li>•No Prospect of Improvement</li> <li>•No Reasonable Alternative</li> <li>•Consultation</li> </ul>                                    | A woman, 80-90 years old. Suffered from depression for about thirty years.                                                               | A generalist End of Life Clinic physician saw patient only twice over 3 weeks, did not interview patient alone or consult any psychiatrists. Told the RTE he “had not a single doubt” about patient meeting due care criteria, did not see the need to consult a psychiatrist, and was unaware of the Dutch Psychiatric Association guidelines on EAS request from psychiatric patients. The RTE determined “the physician did not act with the caution that would have been expected in the case of a request for assisted suicide from a psychiatric patient. The physician in this case should have taken more time for interviews with the patient, also not in the presence of her children. Since the physician and the consultant lacked                                                                                     |

|         |                                                                                                                                                     |                                                                                                                                                                                       |                                                                                                                                                                                                                                                                                                                                                                                                                                                                                                                                                                                                                                                                                                                                                                                                                                                                                                                                                                                                                                                                                                                                     |
|---------|-----------------------------------------------------------------------------------------------------------------------------------------------------|---------------------------------------------------------------------------------------------------------------------------------------------------------------------------------------|-------------------------------------------------------------------------------------------------------------------------------------------------------------------------------------------------------------------------------------------------------------------------------------------------------------------------------------------------------------------------------------------------------------------------------------------------------------------------------------------------------------------------------------------------------------------------------------------------------------------------------------------------------------------------------------------------------------------------------------------------------------------------------------------------------------------------------------------------------------------------------------------------------------------------------------------------------------------------------------------------------------------------------------------------------------------------------------------------------------------------------------|
|         |                                                                                                                                                     |                                                                                                                                                                                       | psychiatric expertise, the physician should also have contacted another expert.”                                                                                                                                                                                                                                                                                                                                                                                                                                                                                                                                                                                                                                                                                                                                                                                                                                                                                                                                                                                                                                                    |
| 2014-02 | <ul style="list-style-type: none"> <li>•Unbearable Suffering</li> </ul>                                                                             | A woman, 80-90 years old. Placed in a nursing home after a second cerebrovascular accident that left her with cognitive disorders and aphasia.                                        | Patient not competent, in a NH; had a 20y old advance directive, which she confirmed orally to her physician, that requested EAS if she were permanently placed in NH. NH doctor noted patient to be a “quiet and friendly woman,” refused children’s request for EAS; children turned to End of Life Clinic. The Clinic doctor saw patient twice. Consultant saw in “[the patient’s] eyes... quite clearly her despair and unhappiness” but also said it was a “very difficult case, and that the limits of the law would be sought here.” Physician “did not see any signs of unbearable suffering in the patient and based his decision exclusively on the fact that the patient was placed in a nursing home...” RTE concluded that “The mere fact that the patient permanently had to leave her own environment and be admitted to a nursing home is insufficient to assume that the suffering is unbearable... the physician—merely on the basis of the picture of the patient that was outlined to him—expended insufficient time and effort in this situation to confirm the unbearable nature of the patient’s suffering.” |
| 2014-05 | <ul style="list-style-type: none"> <li>•Unbearable suffering</li> <li>•No prospect of improvement</li> <li>•No reasonable alternative</li> </ul>    | A woman, 40-50 years old. Tinnitus for more than ten years, severe hyperacusis and neuralgia. Had history of psychiatric disorders including anorexia, PTSD, anxiety, and depression. | Patient had history of not following physician advice, had halted EAS evaluation process several times. End of Life Clinic psychiatrist wrote a triage report 6 months prior, did not address psychiatric issues. SCEN consultant surprised End of Life Clinic physician by saying no further evaluation needed and told RTE that “she wanted to prevent the patient from having to go through another interview with an independent psychiatrist.” Consultant contacted triage doctor “twice to insist that she supplement the report with conclusions regarding DSM Axis I and Axis II based on the triage.” RTE was skeptical of this retroactive “supplement.” RTE determined the End of Life Clinic physician “lacked a clear somatic diagnosis and... the physician... should have had a psychiatric examination performed... especially since the physician initially had a ‘fishy’ feeling about this request... The physician conducted inadequate research on the existence of real options to ease the patient’s suffering...”                                                                                           |
| 2015-01 | <ul style="list-style-type: none"> <li>•Well-considered Request</li> <li>•No Prospect of improvement</li> <li>•No Reasonable alternative</li> </ul> | A woman, over 90 years old. Many non-terminal conditions including macular degeneration, intestinal problems, back pain, and dysphasia.                                               | Patient went to End of Life Clinic when her own doctor refused EAS. Patient refused examination by the Clinic physician. The consultant did not think the request was well considered or the condition futile, and recommended geriatric consult, but the patient refused. End of Life Clinic physician eventually convinced the consultant to change this decision. “The Committee is of the opinion [that the physician] too easily went along with the patient’s refusal to be examined by a geriatrician.”                                                                                                                                                                                                                                                                                                                                                                                                                                                                                                                                                                                                                      |
| 2016-21 | <ul style="list-style-type: none"> <li>•No prospect of improvement</li> <li>•No reasonable alternative</li> </ul>                                   | A man, 50-60 years old. Mild Parkinson’s disease and psychiatric issues related to coping.                                                                                            | Treating psychiatrist and neurologist thought a psychological component played a role in patient’s suffering. Family physician reluctant but consulted SCEN doctor who initially thought not hopeless but told family physician to refer patient to End of Life Clinic. Clinic physician saw patient twice within a week, consulted same SCEN doctor, and without consulting new specialists deemed patient’s condition futile, contrary to what the previous specialists stated. Committee stated, “The physician was not obligated to further scrutinize the advice of the treating neurologist and the judgment of the psychiatrist other than to make accurate record of them. The physician, to reach a well-considered judgment of the hopelessness of the suffering and any treatment alternatives, must consult with the neurologist and the psychiatrist or another specialist expert in this field... The physician had to use this deliberation to                                                                                                                                                                       |

1  
2  
3  
4  
5  
6  
7  
8  
9  
10  
11  
12  
13  
14  
15  
16  
17  
18  
19  
20  
21  
22  
23  
24  
25  
26  
27  
28  
29  
30  
31  
32  
33  
34  
35  
36  
37  
38  
39  
40  
41  
42  
43  
44  
45  
46  
47  
48  
49

|                                                                                                                                                                                                                                                                                      |                                                                                                               |                                                    |                                                                                                                                                                                                                                                                                                                                                                                                                                                                                                                                                                                                                                                                                                                                                                                                                                                                                                                                                                                                                                                                                                                                                                                                                                                                                                                                                                                                                                                          |
|--------------------------------------------------------------------------------------------------------------------------------------------------------------------------------------------------------------------------------------------------------------------------------------|---------------------------------------------------------------------------------------------------------------|----------------------------------------------------|----------------------------------------------------------------------------------------------------------------------------------------------------------------------------------------------------------------------------------------------------------------------------------------------------------------------------------------------------------------------------------------------------------------------------------------------------------------------------------------------------------------------------------------------------------------------------------------------------------------------------------------------------------------------------------------------------------------------------------------------------------------------------------------------------------------------------------------------------------------------------------------------------------------------------------------------------------------------------------------------------------------------------------------------------------------------------------------------------------------------------------------------------------------------------------------------------------------------------------------------------------------------------------------------------------------------------------------------------------------------------------------------------------------------------------------------------------|
|                                                                                                                                                                                                                                                                                      |                                                                                                               |                                                    | check his own judgment against that of the above-named specialists.”                                                                                                                                                                                                                                                                                                                                                                                                                                                                                                                                                                                                                                                                                                                                                                                                                                                                                                                                                                                                                                                                                                                                                                                                                                                                                                                                                                                     |
| 2016-85                                                                                                                                                                                                                                                                              | <ul style="list-style-type: none"> <li>•Voluntary</li> <li>•Well-considered</li> <li>•Medical care</li> </ul> | A woman, 70-80 years old with Alzheimer’s disease. | <p>Patient lacked capacity but had an advance directive. RTE noted: “From the wording of these clauses (‘when I consider that the time is right for me’ and ‘upon my request,’)...it can be deduced that the patient, when preparing [the advance directive], assumed that she herself could and would request euthanasia at the time she chose.” The physician covertly placed a sedative into the patient’s coffee (and gave it subcutaneously also) in order “to prevent the patient from resisting the administration of the euthanasic...” However, “the patient made a withdrawing movement during the insertion of the infusion line, and sat up during the administration of the thiopental, after which she was held to prevent her from resisting further.” The physician justified her actions: “Since the patient was no longer mentally competent, [the patient’s] utterances were no longer relevant at that time...” RTE further noted, “even if the patient had said prior to the implementation that she did not want to die, the physician stated without prompting that she would have proceeded with the termination of life. ...the physician crossed a line with her actions.” Earlier in the report, the physician “emphasized that she wanted to be fully transparent regarding the manner in which the termination of life proceeded, since in the future, euthanasia might occur more frequently in incompetent patients.”</p> |
| <p><sup>a</sup> Abbreviations include Euthanasia and Physician-Assisted Suicide (EAS), Nursing Home (NH), and Euthanasia Review Committee (RTE). SCEN consultants were trained by the Support and Consultation on Euthanasia in the Netherlands (SCEN) organization (see Box 1).</p> |                                                                                                               |                                                    |                                                                                                                                                                                                                                                                                                                                                                                                                                                                                                                                                                                                                                                                                                                                                                                                                                                                                                                                                                                                                                                                                                                                                                                                                                                                                                                                                                                                                                                          |

1  
2  
3  
4  
5  
6  
7  
8  
9  
10  
11  
12  
13  
14  
15  
16  
17  
18  
19  
20  
21  
22  
23  
24  
25  
26  
27  
28  
29  
30  
31  
32  
33  
34  
35  
36  
37  
38  
39  
40  
41  
42  
43  
44  
45  
46  
47  
48  
49  
50  
51  
52  
53  
54  
55  
56  
57  
58  
59  
60

| <b>Supplementary Table. Due Care Criteria Deemed Not Met by RTE Committees</b>                                                                                                                                                                                                                   |                                |                        |
|--------------------------------------------------------------------------------------------------------------------------------------------------------------------------------------------------------------------------------------------------------------------------------------------------|--------------------------------|------------------------|
| <b>Criterion Not Met</b>                                                                                                                                                                                                                                                                         | <b>No. Not Met<sup>a</sup></b> | <b>(%)<sup>a</sup></b> |
| A.1 Voluntary Request                                                                                                                                                                                                                                                                            | 4                              | (13)                   |
| A.2 Well-Considered Request                                                                                                                                                                                                                                                                      | 5                              | (16)                   |
| B.1 Unbearable Suffering                                                                                                                                                                                                                                                                         | 6                              | (19)                   |
| B.2 No Prospect of Improvement <sup>b</sup>                                                                                                                                                                                                                                                      | 6                              | (19)                   |
| C. Patient Informed About Situation                                                                                                                                                                                                                                                              | 1                              | (3)                    |
| D. No Reasonable Alternative                                                                                                                                                                                                                                                                     | 7                              | (22)                   |
| E. Consulted Independent Physician                                                                                                                                                                                                                                                               | 10                             | (31)                   |
| F. Exercised Due Medical Care                                                                                                                                                                                                                                                                    | 14                             | (44)                   |
| <sup>a</sup> A given case can have multiple criteria that were not met. The percentages represent frequency of due care not met, based on total number of cases (32) as denominator.<br><sup>b</sup> One case report did not specify whether the No Prospect of Improvement requirement was met. |                                |                        |
