# Supplementary material for: Euthanasia and physician-assisted suicide not meeting due care criteria in the Netherlands: a qualitative review of review committee judgements
Source: PubMed Central journal article supplement — BMJ Open. 2017 Oct 25;7(10):e017628. doi: 10.1136/bmjopen-2017-017628 (PMC5665211; doi:10.1136/bmjopen-2017-017628), 2017-10-25
Supplement: bmjopen-2017-017628supp001.pdf [file bmjopen-2017-017628supp001.pdf]

| <b>Supplementary Table. Due Care Criteria Deemed Not Met by RTE Committees</b>                                                                                                                                                                                                                   |                                |                        |
|--------------------------------------------------------------------------------------------------------------------------------------------------------------------------------------------------------------------------------------------------------------------------------------------------|--------------------------------|------------------------|
| <b>Criterion Not Met</b>                                                                                                                                                                                                                                                                         | <b>No. Not Met<sup>a</sup></b> | <b>(%)<sup>a</sup></b> |
| A.1 Voluntary Request                                                                                                                                                                                                                                                                            | 4                              | (13)                   |
| A.2 Well-Considered Request                                                                                                                                                                                                                                                                      | 5                              | (16)                   |
| B.1 Unbearable Suffering                                                                                                                                                                                                                                                                         | 6                              | (19)                   |
| B.2 No Prospect of Improvement <sup>b</sup>                                                                                                                                                                                                                                                      | 6                              | (19)                   |
| C. Patient Informed About Situation                                                                                                                                                                                                                                                              | 1                              | (3)                    |
| D. No Reasonable Alternative                                                                                                                                                                                                                                                                     | 7                              | (22)                   |
| E. Consulted Independent Physician                                                                                                                                                                                                                                                               | 10                             | (31)                   |
| F. Exercised Due Medical Care                                                                                                                                                                                                                                                                    | 14                             | (44)                   |
| <sup>a</sup> A given case can have multiple criteria that were not met. The percentages represent frequency of due care not met, based on total number of cases (32) as denominator.<br><sup>b</sup> One case report did not specify whether the No Prospect of Improvement requirement was met. |                                |                        |
